# Supplementary material for: Donor engineering of diphenylamine-substituted tris(2,4,6-trichlorophenyl)methyl radicals for controlling the intramolecular charge transfer and near-infrared photothermal conversion
Source: Royal Society of Chemistry journal article supplement (doi:10.1039/d2tc04508g), 2023-01-01
Supplement: d2tc04508g1.pdf [file d2tc04508g1.pdf]

## Supporting Information

### Donor Engineering of Diphenylamine-Substituted Tris(2,4,6-trichlorophenyl)methyl Radicals for Controlling the Intramolecular Charge Transfer and Near-Infrared Photothermal Conversion

Chuan Yan,<sup>a</sup> Jing Fang,<sup>a</sup> Jiangyu Zhu,<sup>b</sup> Weinan Chen,<sup>a</sup> Min Wang,<sup>a</sup> Kai Chi,<sup>b</sup> Xuefeng Lu,<sup>\*b</sup>  
Gang Zhou<sup>\*a</sup> and Yunqi Liu<sup>\*b</sup>

<sup>a</sup>Laboratory of Advanced Materials, State Key Laboratory of Molecular Engineering of Polymers, Fudan University, Shanghai 200438, P. R. China

<sup>b</sup>Department of Materials Science, State Key Laboratory of Molecular Engineering of Polymers, Fudan University, Shanghai 200438, P. R. China

## Contents

|                                                                                                                                                                             |     |
|-----------------------------------------------------------------------------------------------------------------------------------------------------------------------------|-----|
| 1. General experimental information. ....                                                                                                                                   | S3  |
| 2. Synthesis. ....                                                                                                                                                          | S4  |
| 3. Fig. S1-S4. HRMS spectra of the target neutral radicals. ....                                                                                                            | S6  |
| 4. Fig. S5. HPLC curves of the target neutral radicals. ....                                                                                                                | S8  |
| 5. Fig. S6. TGA curves of the target neutral radicals. ....                                                                                                                 | S9  |
| 6. Fig. S7-S8. Single crystal structure of TTM-BDPA. ....                                                                                                                   | S10 |
| 7. Fig. S9. UV-vis-NIR absorption spectra of the target neutral radicals in different organic solvents. ....                                                                | S12 |
| 8. Fig. S10. PL spectra of the luminescent radicals in different organic solvents. ....                                                                                     | S13 |
| 9. Fig. S11. Photophysical of the radical cations. ....                                                                                                                     | S14 |
| 10. Fig. S12-S15. <sup>1</sup> H NMR spectra of Neutral Radicals and Oxidized Cations. ....                                                                                 | S15 |
| 11. Fig. S16-S17. Calculated frontier orbitals of the neutral and oxidized monocation species<br>.....                                                                      | S17 |
| 12. Fig. S18-S19. Photothermal Conversion Study of Neutral Radicals. ....                                                                                                   | S19 |
| 13. Fig. S20-S22. Photothermal Conversion Study of Oxidized Cations. ....                                                                                                   | S21 |
| 14. Fig. S23-S24. Stability of Neutral Radicals. ....                                                                                                                       | S23 |
| 15. Fig. S25-S26. Stability of Oxidized Cations. ....                                                                                                                       | S24 |
| 16. Fig. S27. Photostability of NIR photothermal conversion materials TTM-BDPA and TTM-TDPA. ....                                                                           | S25 |
| 17. Table S1-S2. Single crystal data of TTM-BDPA. ....                                                                                                                      | S26 |
| 18. Table S3. Electrochemical data of the target neutral radicals. ....                                                                                                     | S28 |
| 19. Table S4. Calculated energy gap of the target neutral radicals. ....                                                                                                    | S29 |
| 20. Table S5. Calculated energies, oscillator strength and compositions of major electronic transitions of the target neutral radicals and their oxidized monocations. .... | S30 |
| 21. Table S6-S13. Computational data of the neutral radicals and the oxidized monocations.<br>.....                                                                         | S31 |
| 22. References. ....                                                                                                                                                        | S51 |

## 1. General experimental information.

All chemicals and reagents were purchased from commercial sources and used as received unless specified. Anhydrous tetrahydrofuran (THF) and toluene were distilled from sodium benzophenone ketyl. Dichloromethane (DCM) and chloroform were distilled from  $\text{CaH}_2$ . All reactions and manipulations were carried out with the use of standard inert atmosphere and Schlenk techniques.

High resolution mass spectroscopies (HRMS) were recorded on a Bruker McriOTOF11 Fourier Transform IonCyclotron Resonance Mass Spectrometer.  $^1\text{H}$  NMR (400 MHz) spectra were recorded on a Varian Mercury Plus-400 spectrometer. The purity was further confirmed on a high performance liquid chromatography (HPLC, Japan Analytical Industry LC-9160NEXT) with a UV-Vis spectrophotometric detector (200 nm) and chloroform as eluent. Electron paramagnetic resonance (EPR) spectra of radicals were recorded with Bruker EMXnano at ambient temperature. Single crystal X-ray diffraction data was collected on a Bruker D8 VENTURE MetalJet diffractometer. UV-Vis-NIR absorption spectra were recorded on a PerkinElmer Lambda-750 spectrophotometer. Photoluminescence (PL) spectra were measured on a HORIBA fluorescence spectrometer (Duetta). Electrochemical measurements were performed using a CHI760 electrochemical analyzer with a glass carbon disk as the working electrode, a platinum wire as the counter electrode and an  $\text{Ag}/\text{Ag}^+$  electrode as the reference electrode at the rate of  $100 \text{ mV s}^{-1}$ , while 0.1 M tetrabutylammonium hexafluorophosphate ( $\text{TBAPF}_6$ ) in dichloromethane was the electrolyte. Redox couple ferrocenium/ferrocene was used as a standard. Thermal stability measurements were performed on a PerkinElmer Pyris 1 TGA analyzer. Density functional theory (DFT) calculations were conducted with the Gaussian 16 program.<sup>1</sup> The geometries were optimized using UB3LYP method and 6-31G(d) basis set. Time-dependent density functional theory (TD-DFT) calculations were carried out using the same program with m06 method.<sup>2</sup> The Measurement of Photothermal Performance was conducted by A NIR laser (Changchun New Industries Optoelectronics Tech. Co., Ltd, MDL-XF-760 nm/MDL-N-980 nm) was used in the measurement of photothermal performance.

## 2. Synthesis.

**TTM**, arylamines **BDPA**, and **TDPA** were synthesized according to references.<sup>3-6</sup>

### Synthesis of **TTM-2DPA** and **TTM-3DPA**.

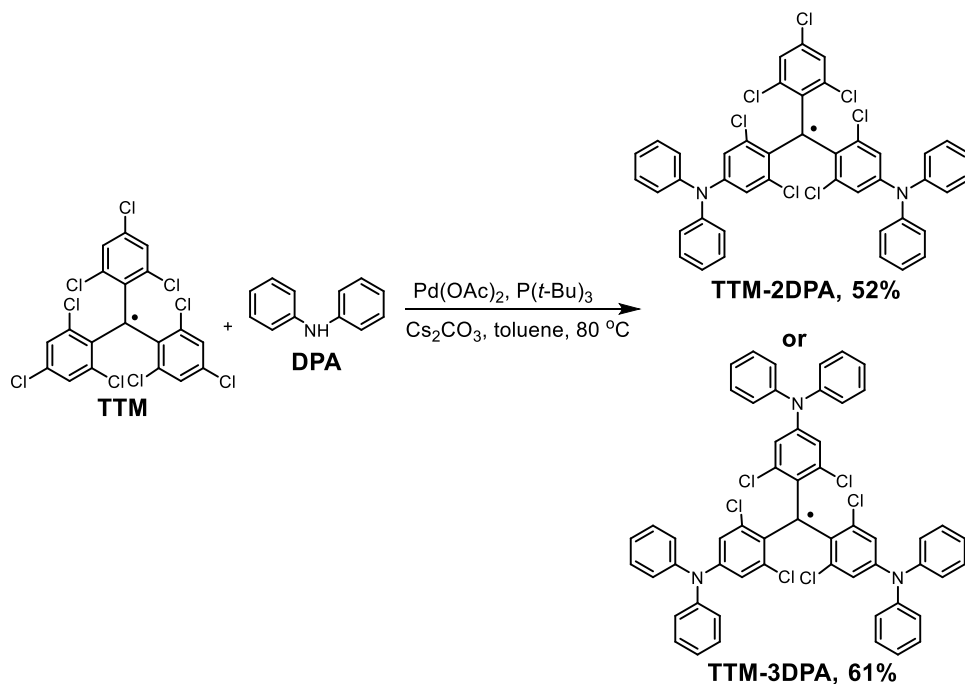

**Scheme S1.** Synthetic routes for **TTM-2DPA** and **TTM-3DPA**.

Under nitrogen atmosphere and in the dark, radical **TTM** (1.00 g, 1.80 mmol), diphenylamine (2.70 mmol or 7.20 mmol),  $\text{Cs}_2\text{CO}_3$  (1.76 g, 5.40 mmol),  $\text{Pd}(\text{OAc})_2$  (0.05 g, 0.22 mmol), and  $\text{P}(t\text{-Bu})_3$  (1.34 g, 0.66 mmol, 10% in toluene) were dissolved in 20 mL dry toluene. Then the mixture was stirred at  $80\text{ }^\circ\text{C}$  for 48 h. After cooling, the solvent was removed under vacuum. The crude product was purified by silica gel column chromatography (PE: EA = 6:1 v/v) to afford the desired radicals **TTM-2DPA** (0.76 g, yield: 52%) or **TTM-3DPA** (1.04 g, yield: 61%) as the dark green solids. **TTM-2DPA**. HRMS (ESI, m/z):  $[\text{M}]^+$  calcd for  $\text{C}_{43}\text{H}_{26}\text{Cl}_7\text{N}_2$ , 816.9886; found 816.9911. **TTM-3DPA**. HRMS (ESI, m/z):  $[\text{M}]^+$  calcd for  $\text{C}_{55}\text{H}_{36}\text{Cl}_6\text{N}_3$ , 950.1011; found 950.1039.

## Synthesis of TTM-BDPA and TTM-TDPA.

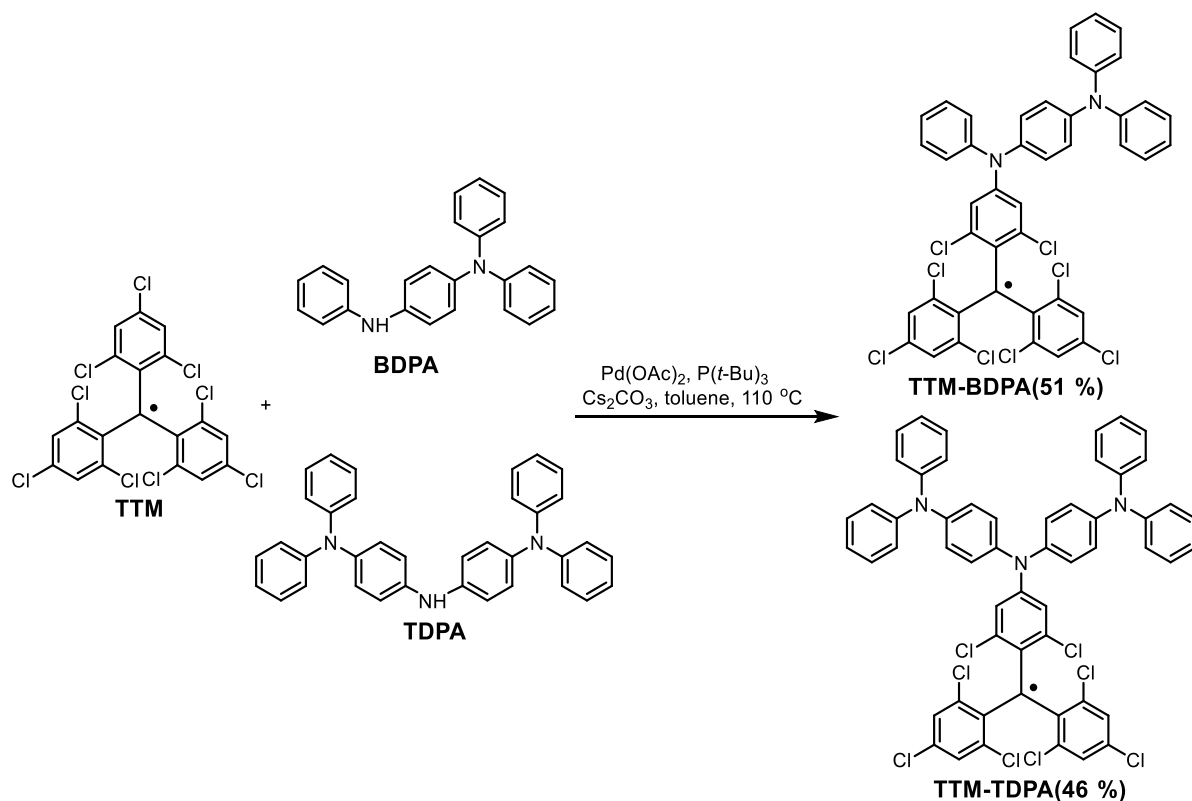

**Scheme S2.** Synthetic routes for **TTM-BDPA** and **TTM-TDPA**.

Under nitrogen atmosphere and in the dark, radical **TTM** (1.00 g, 1.80 mmol), arylphenylamine (1.20 mmol), Cs<sub>2</sub>CO<sub>3</sub> (1.76 g, 5.40 mmol), Pd(OAc)<sub>2</sub> (0.05 g, 0.22 mmol), and P(*t*-Bu)<sub>3</sub> (1.34 g, 0.66 mmol, 10% in toluene) were dissolved in 20 mL dry toluene. Then the mixture was stirred at 110 °C for 36 h. After cooling, the solvent was removed under vacuum. The crude product was purified by silica gel column chromatography (PE: DCM = 8:1 v/v) to afford the desired radicals **TTM-BDPA** (0.52 g, yield: 51%) or **TTM-TDPA** (0.56 g, yield: 46%) as the dark green solids. **TTM-BDPA**. HRMS (ESI, *m/z*): [M]<sup>+</sup> calcd for C<sub>43</sub>H<sub>25</sub>Cl<sub>8</sub>N<sub>2</sub>, 852.9467; found 852.9460. **TTM-TDPA**. HRMS (ESI, *m/z*): [M]<sup>+</sup> calcd for C<sub>55</sub>H<sub>34</sub>Cl<sub>8</sub>N<sub>3</sub>, 1020.0202; found 1020.0237.

### 3. Fig. S1-S4. HRMS spectra of the target neutral radicals.

Fig. S1. HRMS spectrum (ESI) of compound TTM-2DPA.

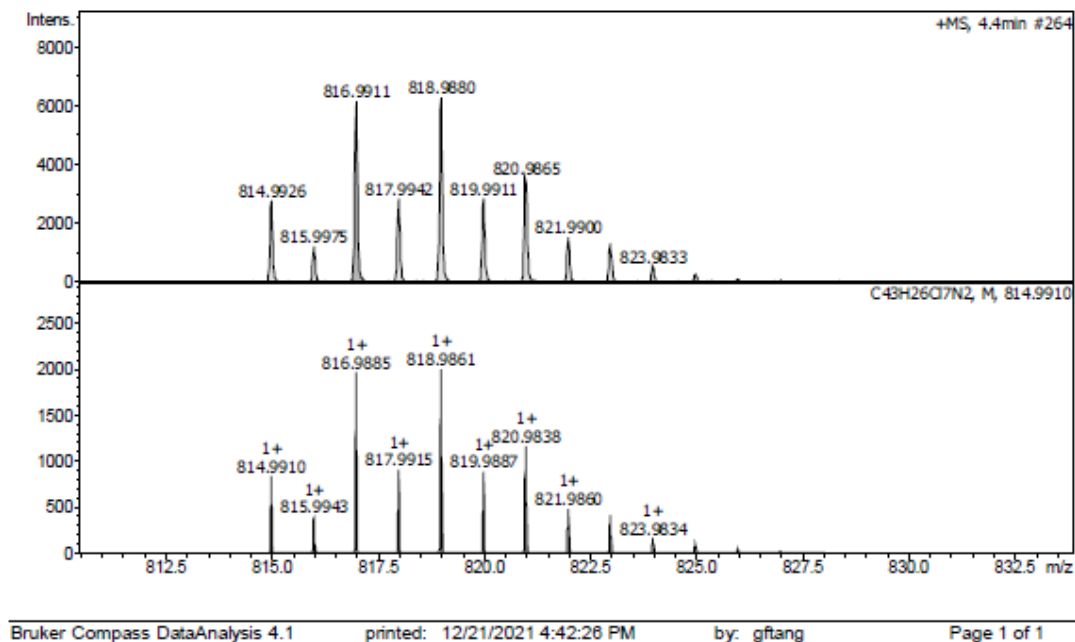

Fig. S2. HRMS spectrum (ESI) of compound TTM-3DPA.

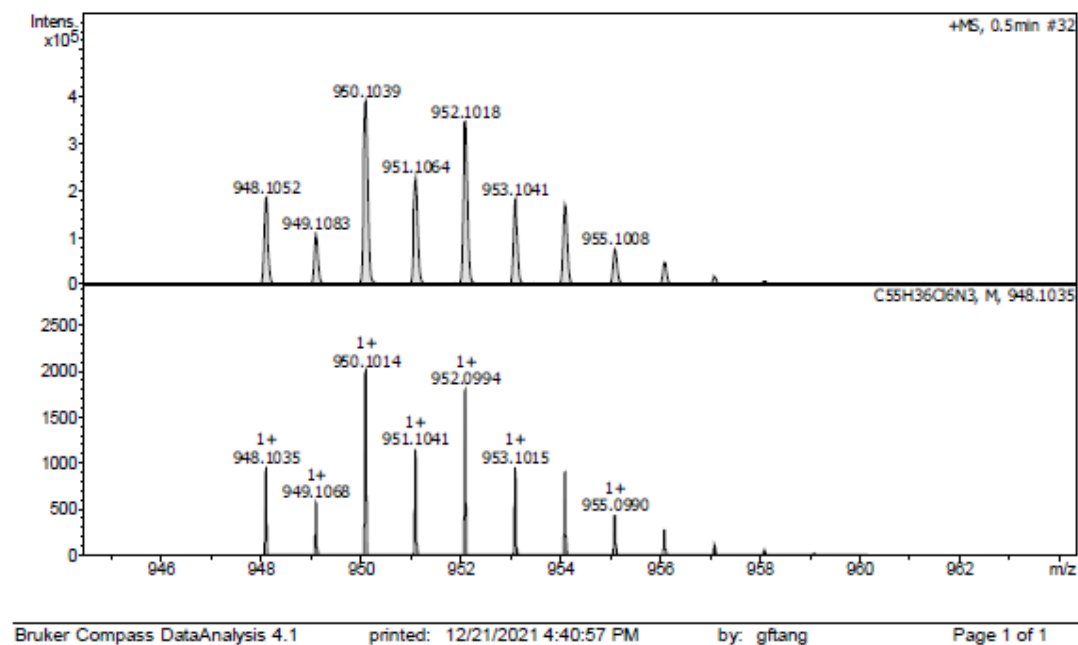

**Fig. S3.** HRMS spectrum (ESI) of compound **TTM-BDPA**.

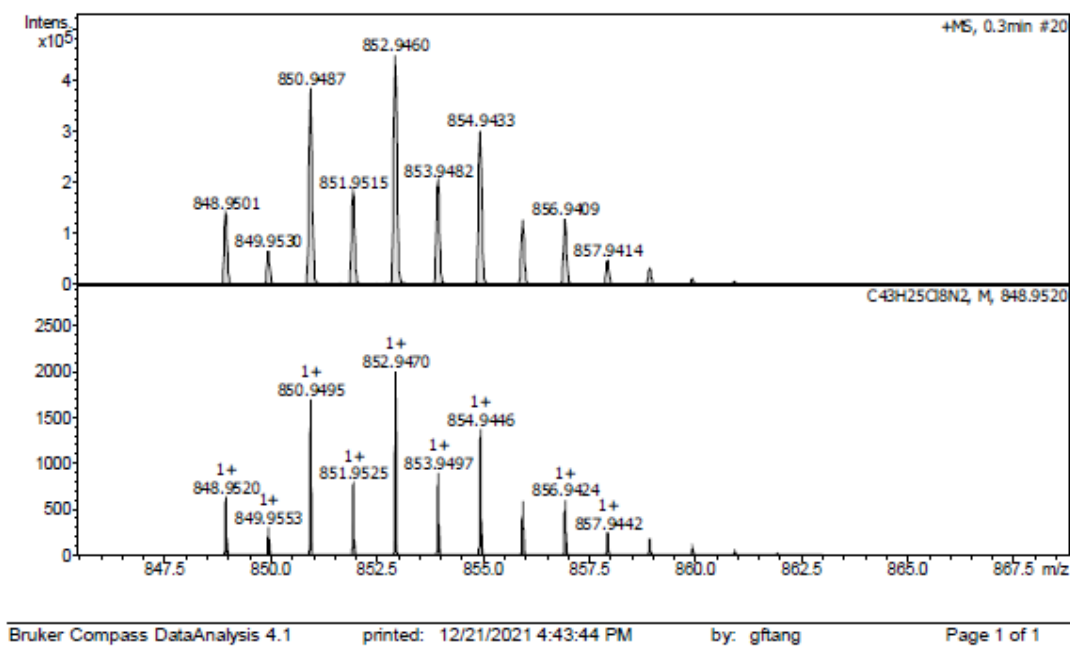

**Fig. S4.** HRMS spectrum (ESI) of compound **TTM-TDPA**.

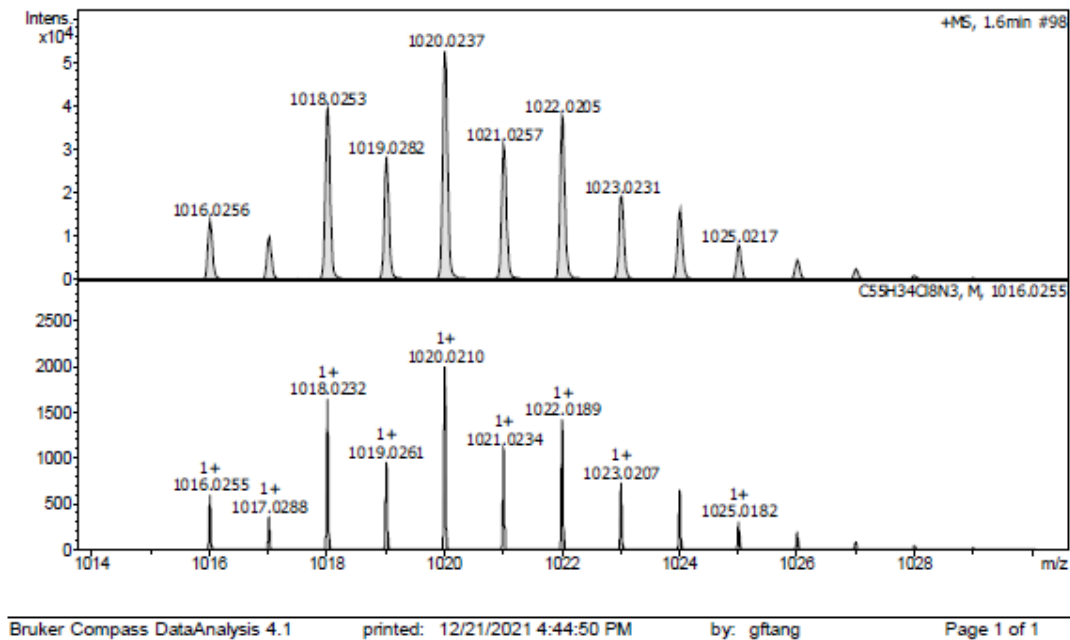

**4. Fig. S5. HPLC curves of the target neutral radicals.**

**Fig. S5.** HPLC curves of TTM-2DPA, TTM-3DPA, TTM-BDPA, and TTM-TDPA.

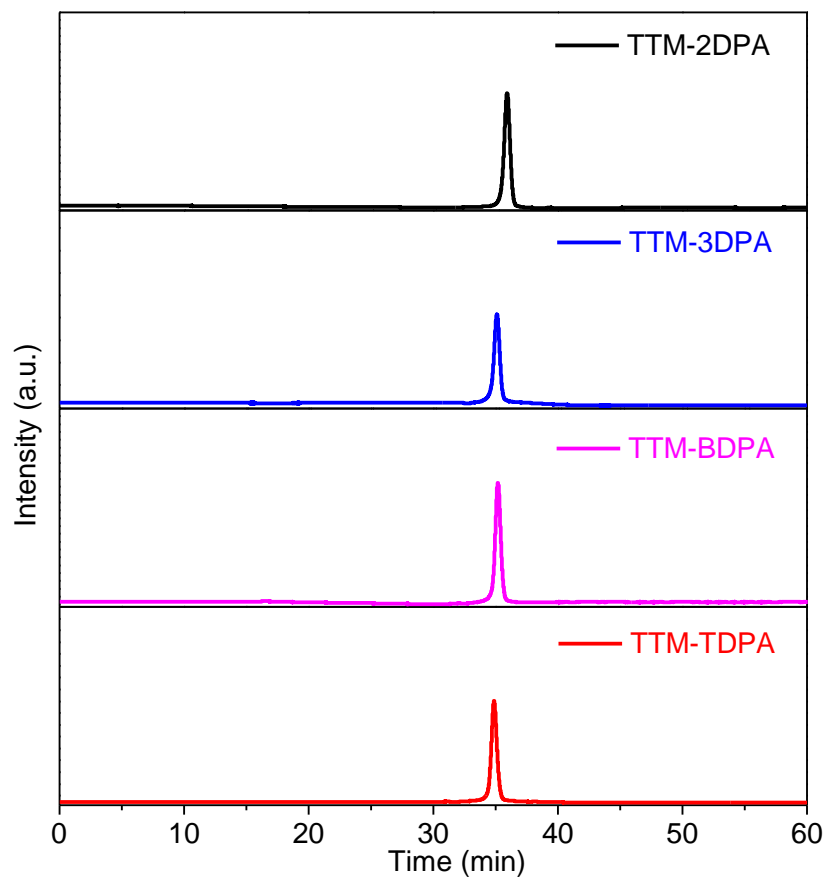



**5. Fig. S6. TGA curves of the target neutral radicals.**

**Fig. S6.** TGA curves of TTM-2DPA, TTM-3DPA, TTM-BDPA, and TTM-TDPA.

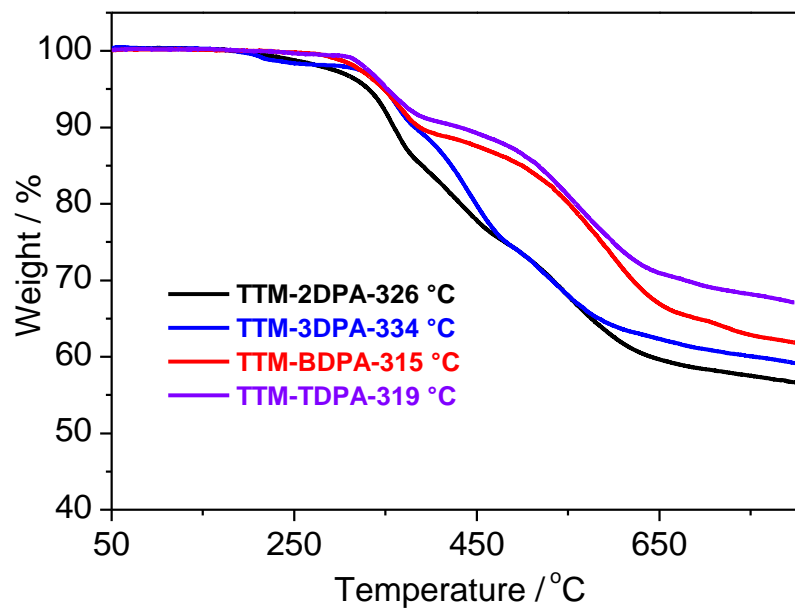

## 6. Fig. S7-S8. Single crystal structure of TTM-BDPA.

Fig. S7. Structure diagram for TTM-BDPA with an ellipsoid contour probability level of 50%.

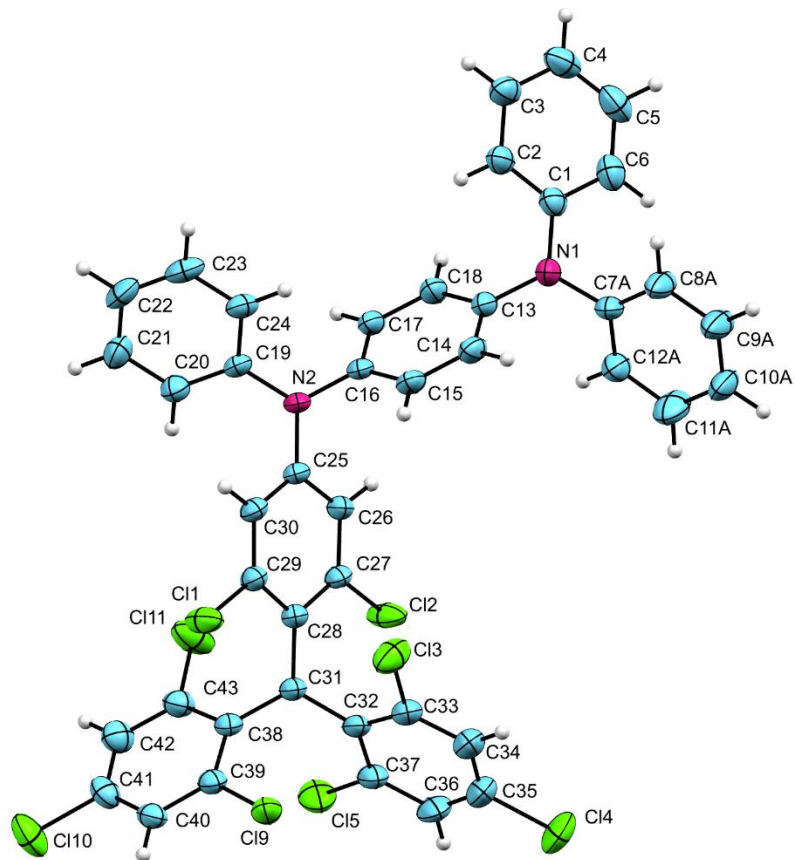

**Fig. S8.** X-ray crystallographic structure, bond angles, and torsion angles of **TTM-BDPA**.

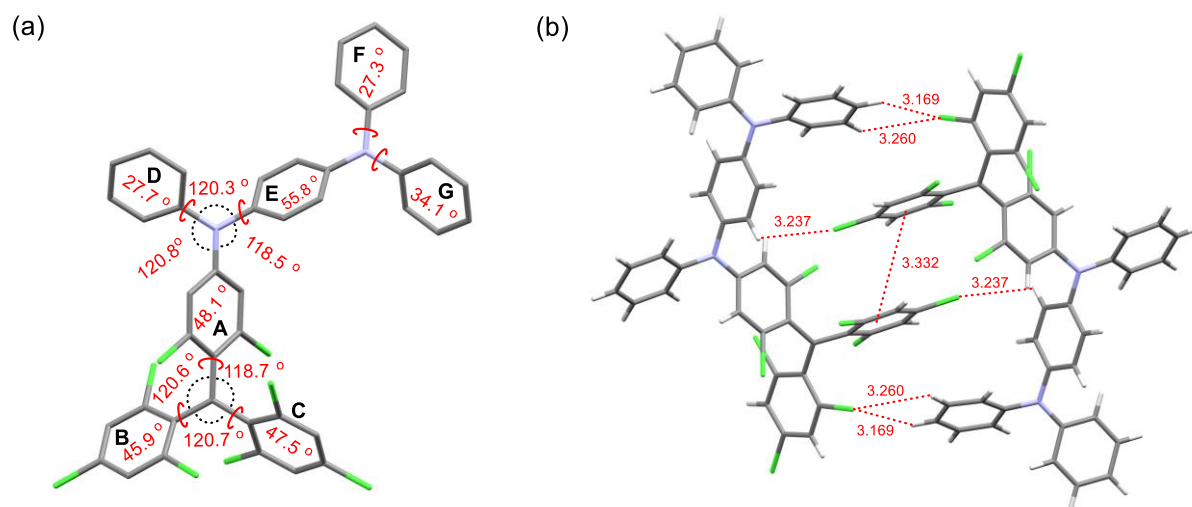

## 7. Fig. S9. UV-vis-NIR absorption spectra of the target neutral radicals in different organic solvents.

**Fig. S9.** UV-vis-NIR absorption spectra of (a) TTM-2DPA, (b) TTM-3DPA, (c) TTM-BDPA, and (d) TTM-TDPA in different organic solvents, respectively.

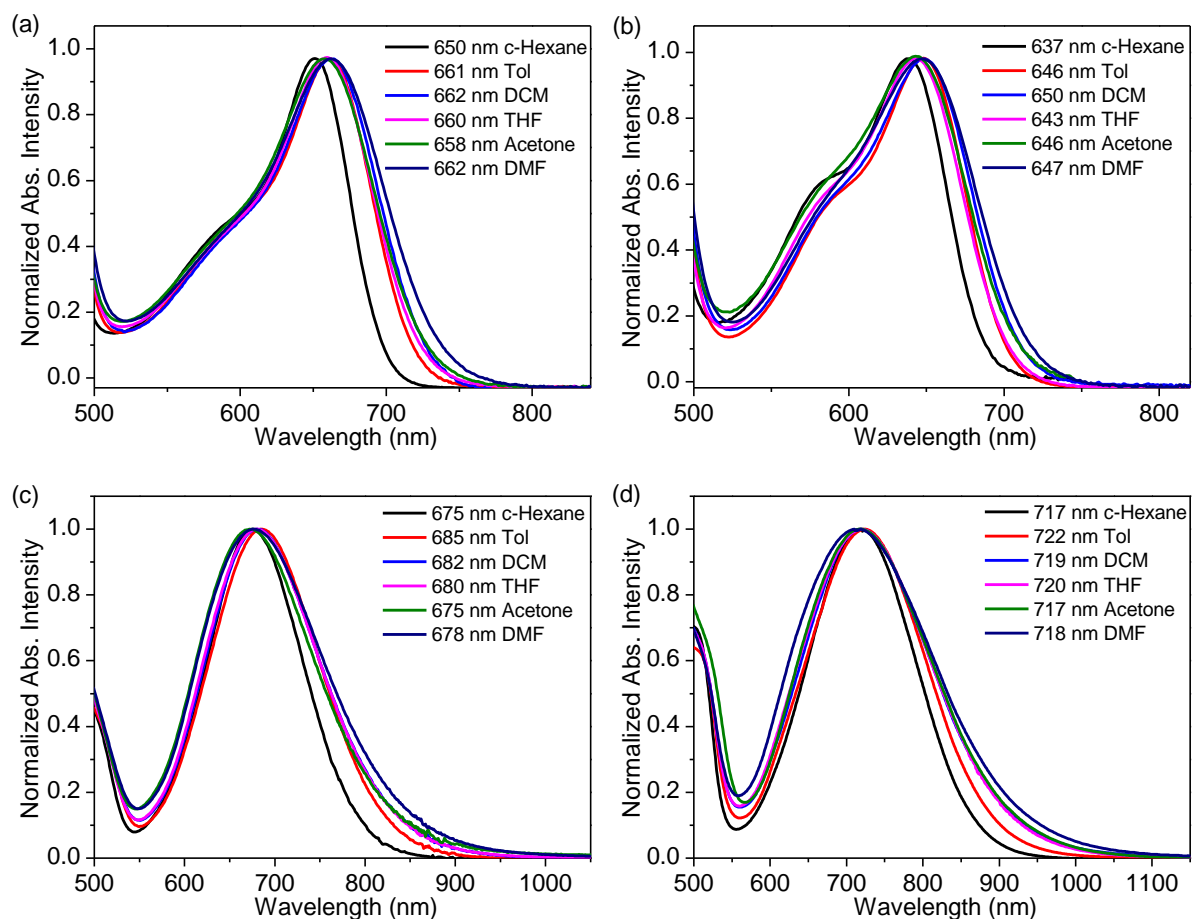

## 8. Fig. S10. PL spectra of the luminescent radicals in different organic solvents.

**Fig. S10.** PL spectra of (a) **TTM-2DPA** and (b) **TTM-3DPA** in different organic solvents, respectively.

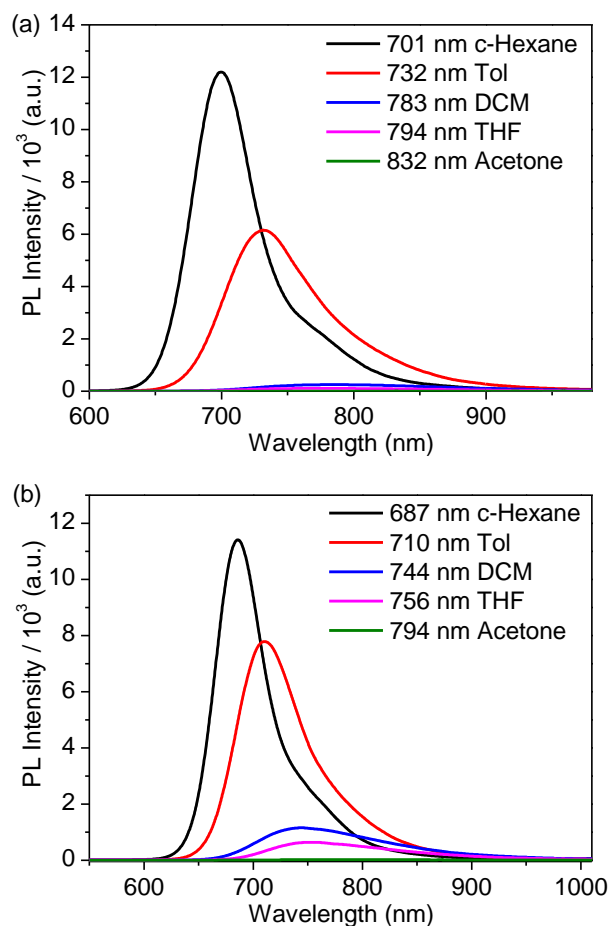

The PL intensity of **TTM-2DPA** and **TTM-3DPA** in DMF solution is too weak to be recorded.

## 9. Fig. S11. Photophysical of the radical cations.

Fig. S11. Illustration diagrams of the D-A interactions for (a)  $\text{TTM-2DPA}^+$ , (b)  $\text{TTM-3DPA}^+$ , (c)  $\text{TTM-BDPA}^+$ , and (d)  $\text{TTM-TDPA}^+$ , respectively.

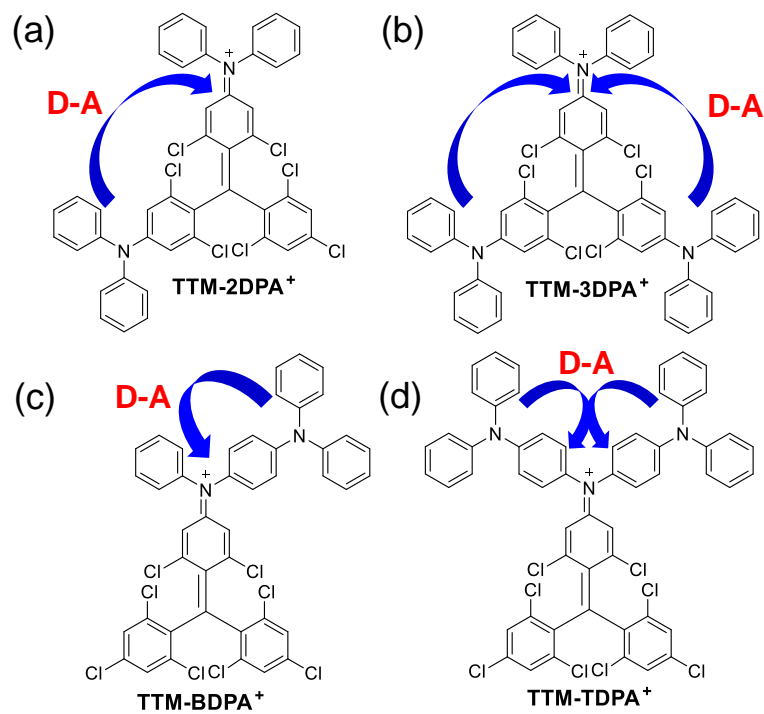

**10. Fig. S12-S15.  $^1\text{H}$  NMR spectra of Neutral Radicals and Oxidized Cations.**

**Fig. S12.**  $^1\text{H}$  NMR spectra for **TTM-2DPA** and **TTM-2DPA $^+$**  in  $\text{CDCl}_3$ .

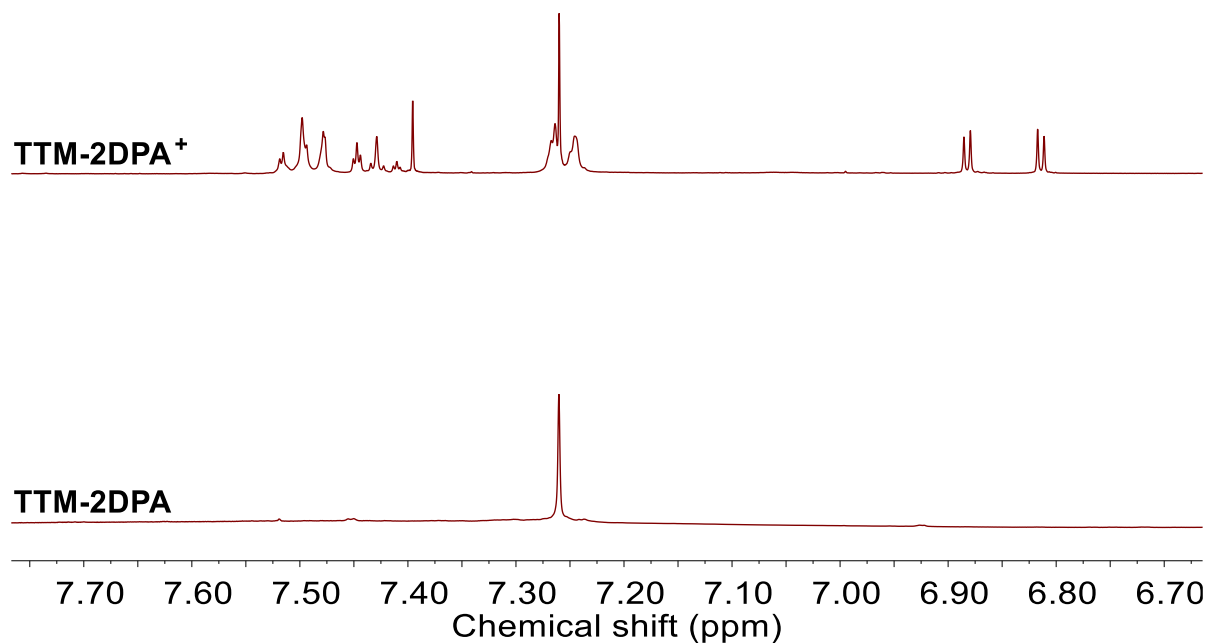

**Fig. S13.**  $^1\text{H}$  NMR spectra for **TTM-3DPA** and **TTM-3DPA $^+$**  in  $\text{CDCl}_3$ .

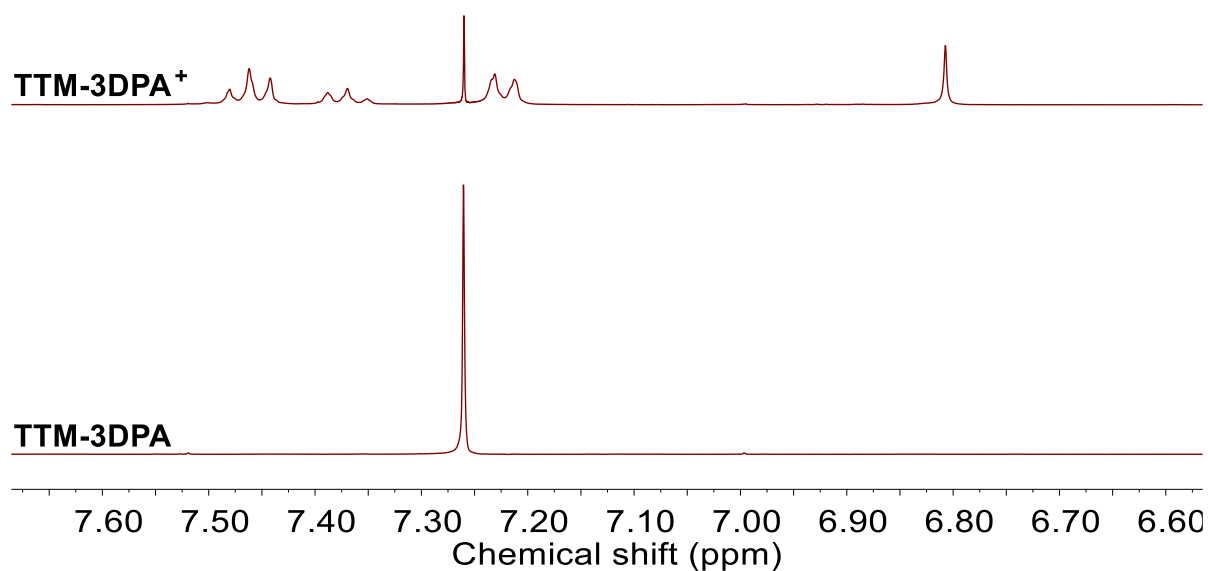

**Fig. S14.**  $^1\text{H}$  NMR spectra for **TTM-BDPA** and **TTM-BDPA<sup>+</sup>** in  $\text{CDCl}_3$ .

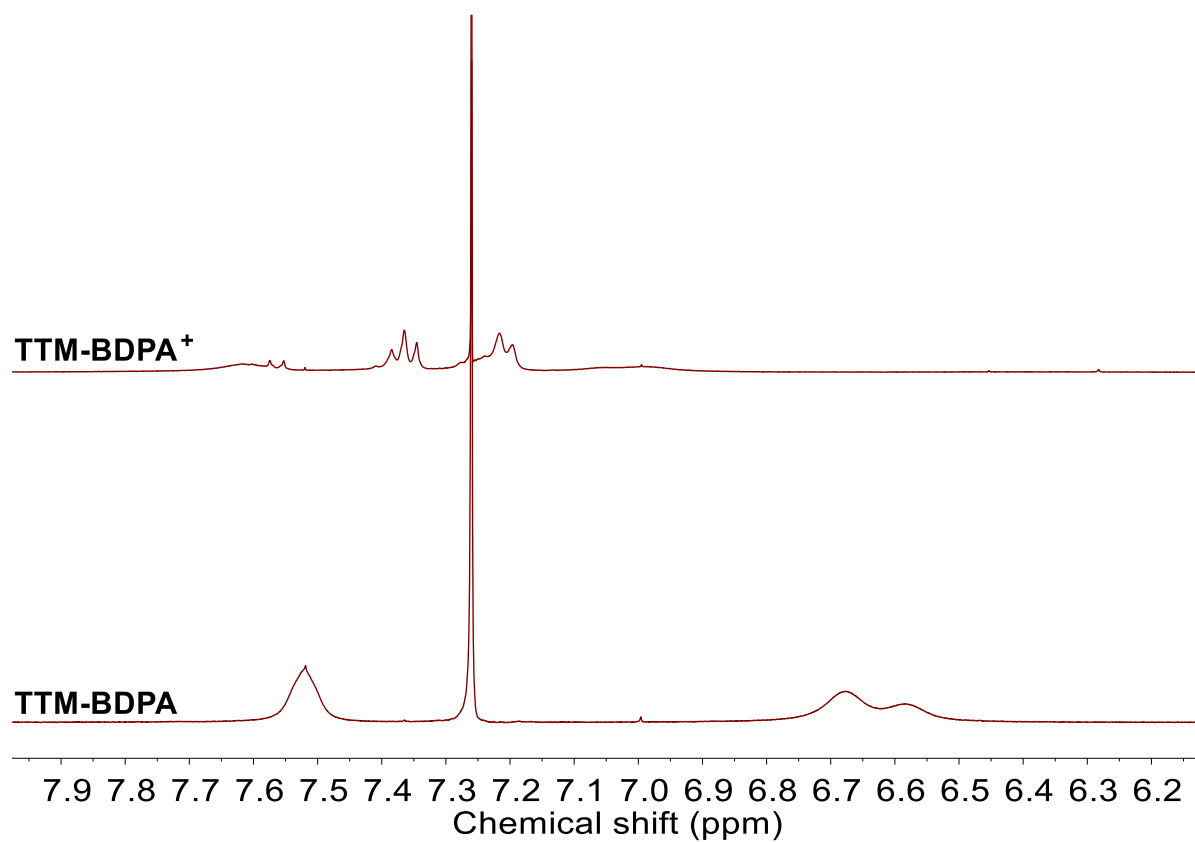

**Fig. S15.**  $^1\text{H}$  NMR spectra for **TTM-TDPA** and **TTM-TDPA<sup>+</sup>** in  $\text{CDCl}_3$ .

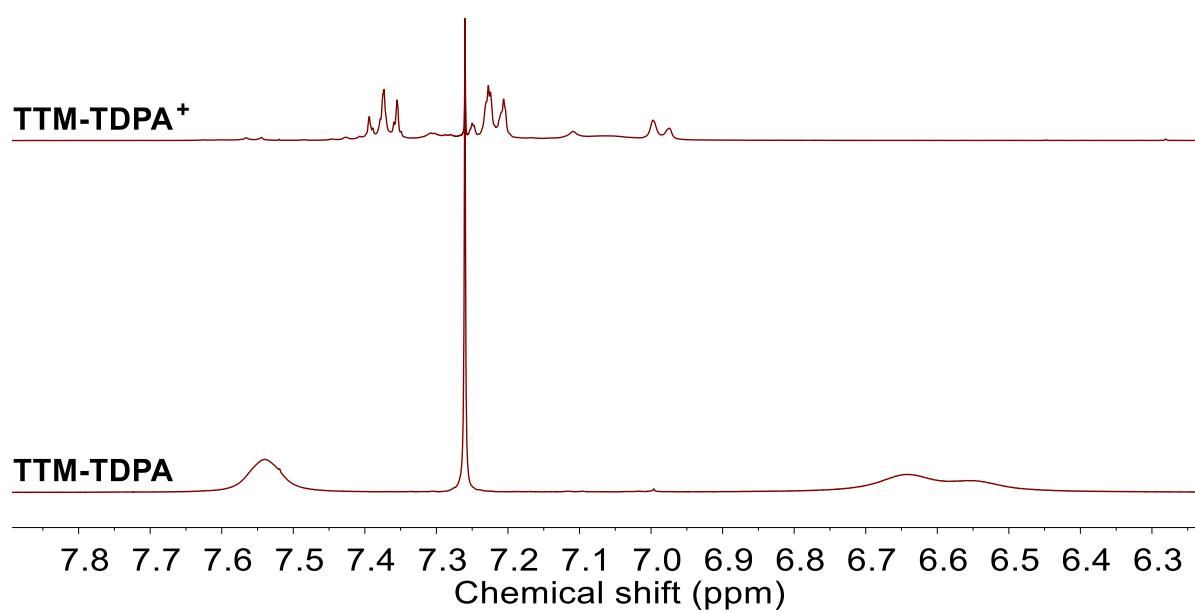



## 11. Fig. S16-S17. Calculated frontier orbitals of the neutral and oxidized monocation species

Fig. S16. Molecular orbitals of (a) TTM-2DPA, (b) TTM-3DPA, (c) TTM-BDPA, and (d) TTM-TDPA.

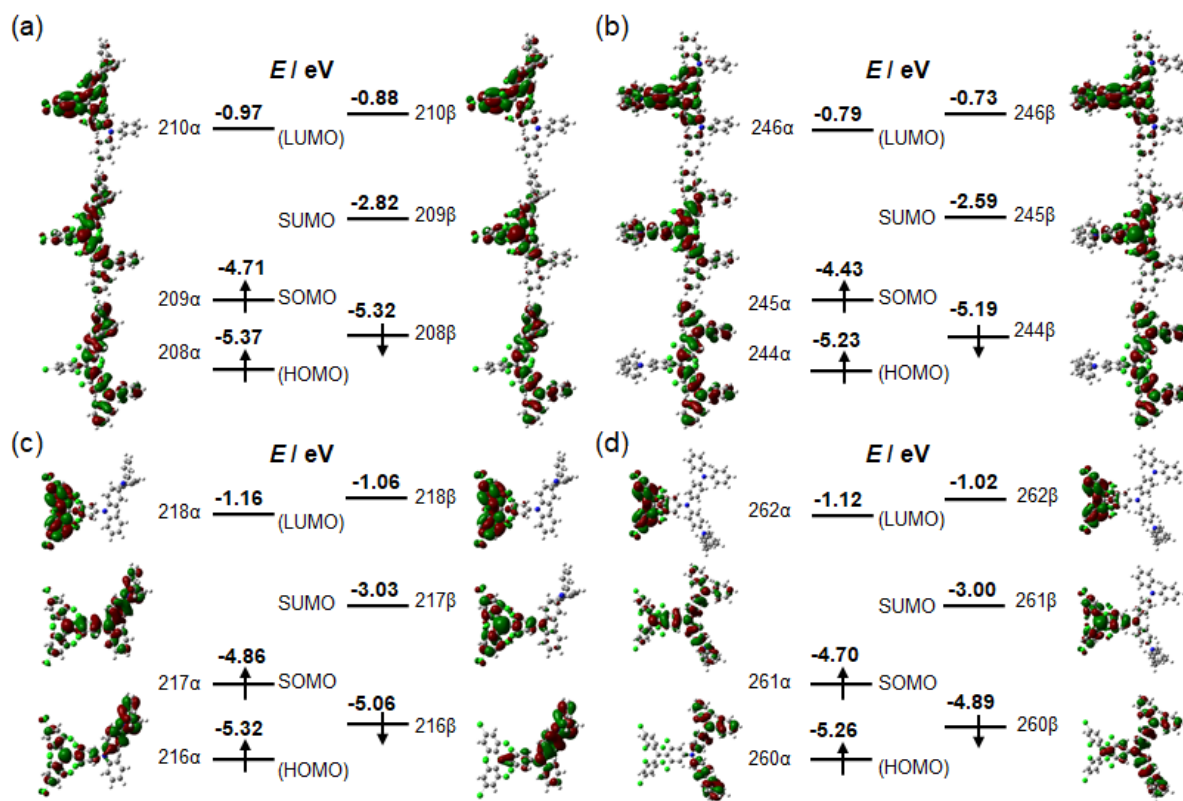

**Fig. S17.** Molecular orbitals of **TTM-2DPA<sup>+</sup>**, **TTM-3DPA<sup>+</sup>**, **TTM-BDPA<sup>+</sup>**, and **TTM-TDPA<sup>+</sup>**.

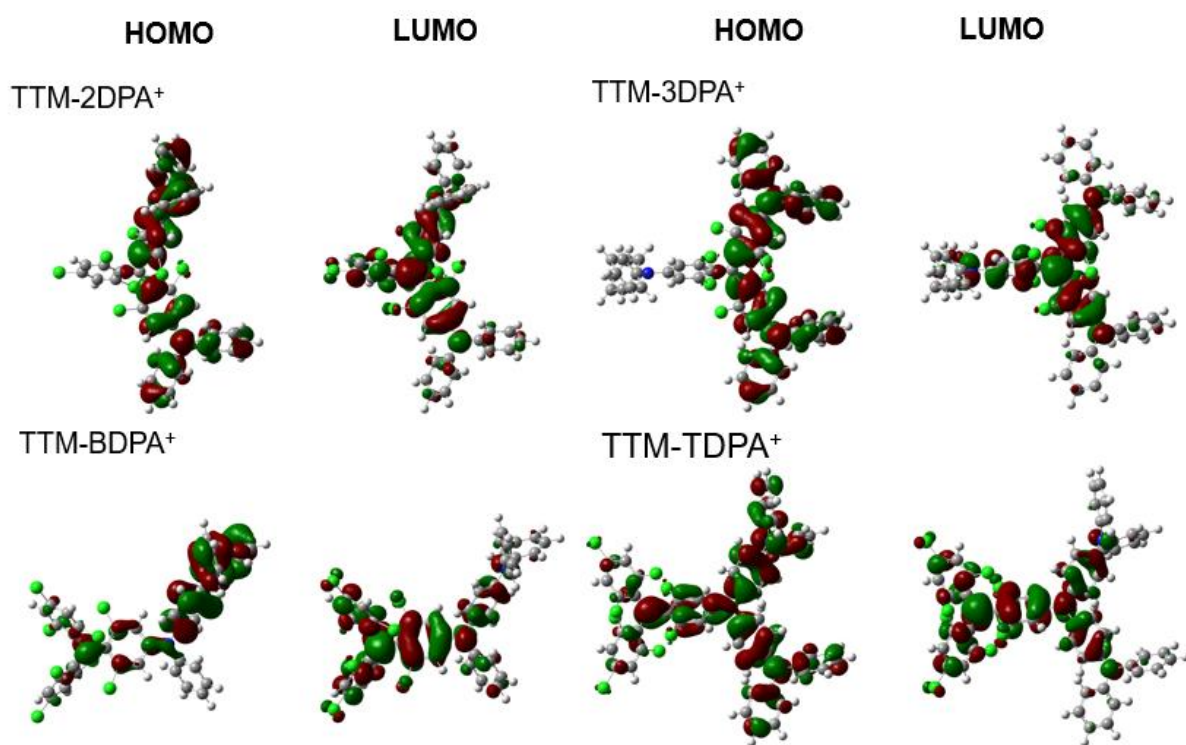

## 12. Fig. S18-S19. Photothermal Conversion Study of Neutral Radicals.

### 1. Experimental details.

To investigate the photothermal conversion properties, radicals **TTM-DPA**, **TTM-2DPA**, **TTM-3DPA**, **TTM-BDPA**, and **TTM-TDPA** were dissolved in cyclohexane solution with a 50  $\mu\text{M}$  concentration. then 0.4 mL of this solution was taken into a centrifuge tube and irradiated by 760 nm laser at 0.4 W /  $\text{cm}^2$ . The temperature changes of this solution were monitored by an infrared camera. Related measurements and calculations were conducted according to reference.<sup>7</sup>

The photothermal conversion efficiencies ( $\eta$ ) were calculated by the following:

$$\eta = hS(\Delta T_{\text{sample}} - \Delta T_{\text{solvent}}) / I(1 - 10^{-A}) \quad (1)$$

$$hS = \Sigma mC_p / \tau_s \quad (2)$$

$$\tau_s = -t / \ln \theta \quad (3)$$

$$\theta = (T_{\text{amb}} - T) / (T_{\text{amb}} - T_{\text{max}}) \quad (4)$$

Where  $h$  is the heat transfer coefficient,  $S$  is the surface area of the container,  $\tau_s$  is the sample system time constant,  $m$  is the mass of the products,  $C_p$  is the specific heat capacity of the solvent, and the value of  $\tau_s$  was obtained from the cooling curves of these solutions.<sup>8</sup>

According to this equation,  $\Sigma mC_p = m_{\text{(cyclohexane)}} \cdot C_{p\text{(cyclohexane)}} = \rho_{\text{(cyclohexane)}} \cdot V_{\text{(cyclohexane)}} \cdot C_{p\text{(cyclohexane)}} = 0.790 \times 0.4 \times 1.85 = 0.5846 \text{ J} \cdot \text{K}^{-1}$ .  $\Delta T_{\text{solvent}} = 1.7 \text{ }^\circ\text{C}$  (Figure 7c in main text),  $I = 0.4 \text{ W} / \text{cm}^2$ , and the absorbance at 760 nm for **TTM-BDPA** and **TTM-TDPA** were 0.15881 and 0.39776 (Figure 7b in main text), respectively.

### 2. TTM-BDPA.

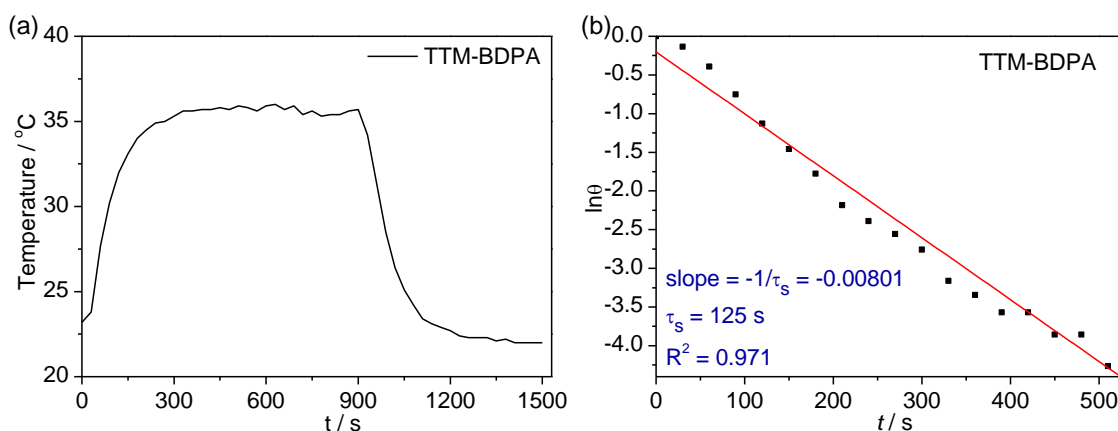

**Fig. S18.** (a) Heating and cooling curve of **TTM-BDPA**. (b) Fitting linear of  $\ln\theta$ - $t$ .

Photothermal conversion efficiency  $\eta$  of **TTM-BDPA** was calculated by equations above. A fitting linear of  $\ln\theta$ -t was obtained by Eqs (3) and (4), by which  $\tau_s$  was calculated as 125 s. Thus,  $hS = 0.5846 / 125 = 4.68 \times 10^{-3} \text{ J}\cdot\text{K}^{-1}\cdot\text{S}^{-1}$ .  $\Delta T_{\text{sample}} = 12.5 \text{ }^\circ\text{C}$ .  $A_1 = 0.15881$ . Eventually,  $\eta_1 = 4.68 \times 10^{-3} \times (12.5-1.7) / [0.4 \times (1 - 10^{-0.15881})] = 41\%$ .

### 3.TTM-TDPA.

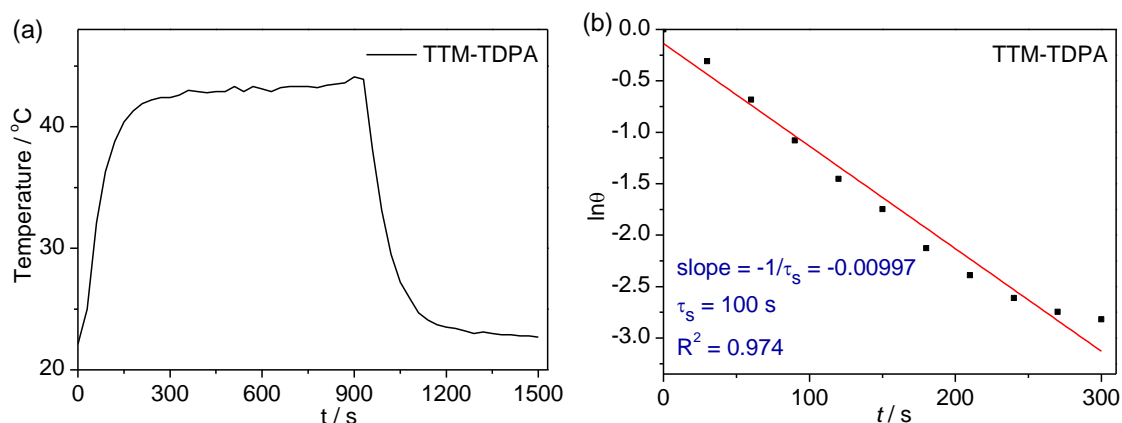

**Fig. S19.** (a) Heating and cooling curve of **TTM-TDPA**. (b) Fitting linear of  $\ln\theta$ -t.

Photothermal conversion efficiency  $\eta$  of **TTM-TDPA** was calculated by equations above. A fitting linear of  $\ln\theta$ -t was obtained by Eqs (3) and (4), by which  $\tau_s$  was calculated as 100 s. Thus,  $hS = 0.5846 / 100 = 5.85 \times 10^{-3} \text{ J}\cdot\text{K}^{-1}\cdot\text{S}^{-1}$ .  $\Delta T_{\text{sample}} = 22.0 \text{ }^\circ\text{C}$ .  $A_1 = 0.39776$ . Eventually,  $\eta_1 = 5.85 \times 10^{-3} \times (22.0-1.7) / [0.4 \times (1 - 10^{-0.39776})] = 50\%$ .

### 13. Fig. S20-S22. Photothermal Conversion Study of Oxidized Cations.

#### 1. Experimental details.

To investigate the photothermal conversion properties of oxidized cations with obvious NIR absorption,  $\text{TTM-2DPA}^+$ ,  $\text{TTM-3DPA}^+$ ,  $\text{TTM-BDPA}^+$ , and  $\text{TTM-TDPA}^+$  were dissolved in chloroform solution with a 10  $\mu\text{M}$  concentration. then 0.4 mL of this solution was taken into a centrifuge tube and irradiated by 980 nm laser at 0.4  $\text{W} / \text{cm}^2$ . The temperature changes of this solution were monitored by an infrared camera. Related measurements and calculations were conducted according to reference.<sup>7</sup>

The photothermal conversion efficiencies ( $\eta$ ) were calculated by the following:

$$\eta = hS(\Delta T_{\text{sample}} - \Delta T_{\text{solvent}}) / I(1 - 10^{-A}) \quad (1)$$

$$hS = \Sigma mC_p / \tau_s \quad (2)$$

$$\tau_s = -t / \ln \theta \quad (3)$$

$$\theta = (T_{\text{amb}} - T) / (T_{\text{amb}} - T_{\text{max}}) \quad (4)$$

Where  $h$  is the heat transfer coefficient,  $S$  is the surface area of the container,  $\tau_s$  is the sample system time constant,  $m$  is the mass of the products,  $C_p$  is the specific heat capacity of the solvent, and the value of  $\tau_s$  was obtained from the cooling curves of these solutions.<sup>8</sup>

According to this equation,  $\Sigma mC_p = m(\text{chloroform}) \cdot C_p(\text{chloroform}) = \rho(\text{chloroform}) \cdot V(\text{chloroform}) \cdot C_p(\text{chloroform}) = 1.480 \times 0.4 \times 0.98 = 0.5802 \text{ J} \cdot \text{K}^{-1}$ .  $\Delta T_{\text{solvent}} = 0.7 \text{ }^\circ\text{C}$  (Fig. S20b),  $I = 0.4 \text{ W} / \text{cm}^2$ , and the absorbance at 980 nm for  $\text{TTM-BDPA}^+$  and  $\text{TTM-TDPA}^+$  were 0.33615 and 0.53555, respectively.

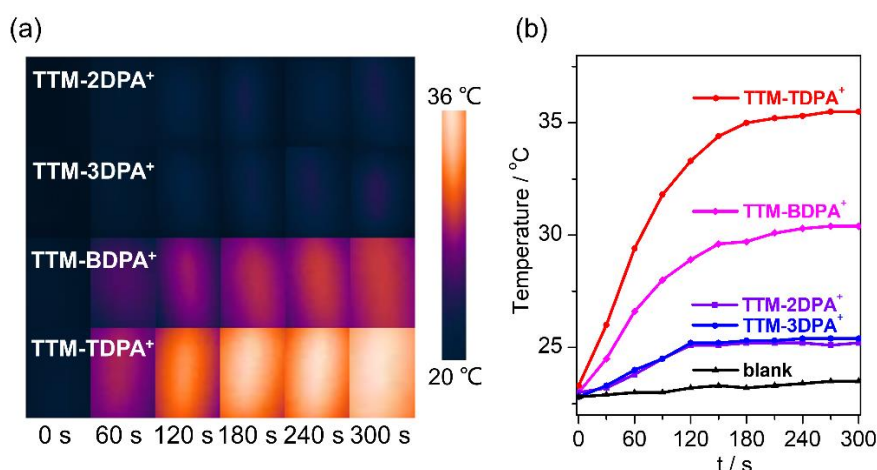

**Fig. S20.** (a) NIR thermal images and (b) photothermal conversion curves of  $\text{TTM-2DPA}^+$ ,  $\text{TTM-3DPA}^+$ ,  $\text{TTM-BDPA}^+$ , and  $\text{TTM-TDPA}^+$  under 980 nm laser irradiation ( $0.4 \text{ W} / \text{cm}^2$ ).

## 2. TTM-BDPA<sup>+</sup>.

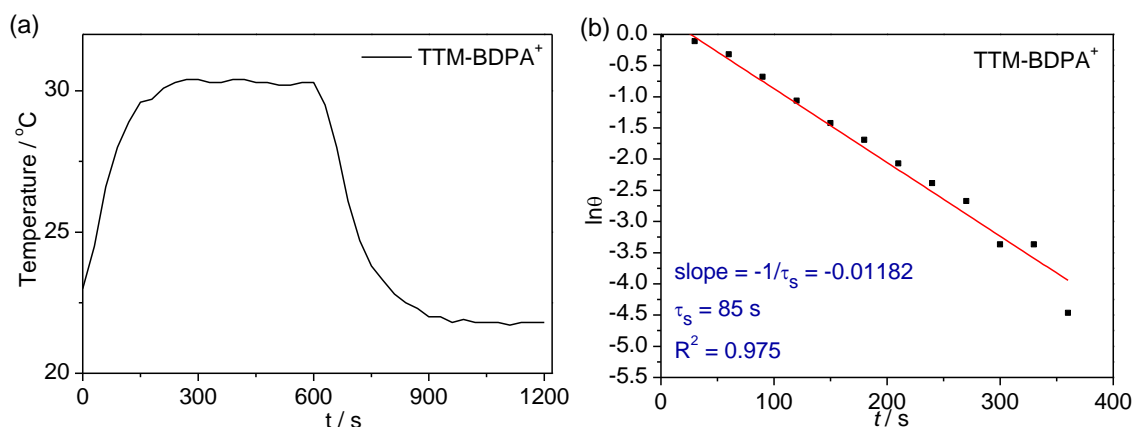

**Fig. S21.** (a) Heating and cooling curve of TTM-BDPA<sup>+</sup>. (b) Fitting linear of  $\ln\theta$ -t.

Photothermal conversion efficiency  $\eta$  of TTM-BDPA<sup>+</sup> was calculated by equations above. A fitting linear of  $\ln\theta$ -t was obtained by Eqs (3) and (4), by which  $\tau_s$  was calculated as 85 s. Thus,  $hS = 0.5802 / 85 = 6.83 \times 10^{-3} \text{ J}\cdot\text{K}^{-1}\cdot\text{S}^{-1}$ .  $\Delta T_{\text{sample}} = 7.4 \text{ }^\circ\text{C}$ .  $A_1 = 0.33615$ . Eventually,  $\eta_1 = 6.83 \times 10^{-3} \times (7.4 - 0.7) / [0.4 \times (1 - 10^{-0.33615})] = 21\%$ .

## 3. TTM-TDPA<sup>+</sup>.

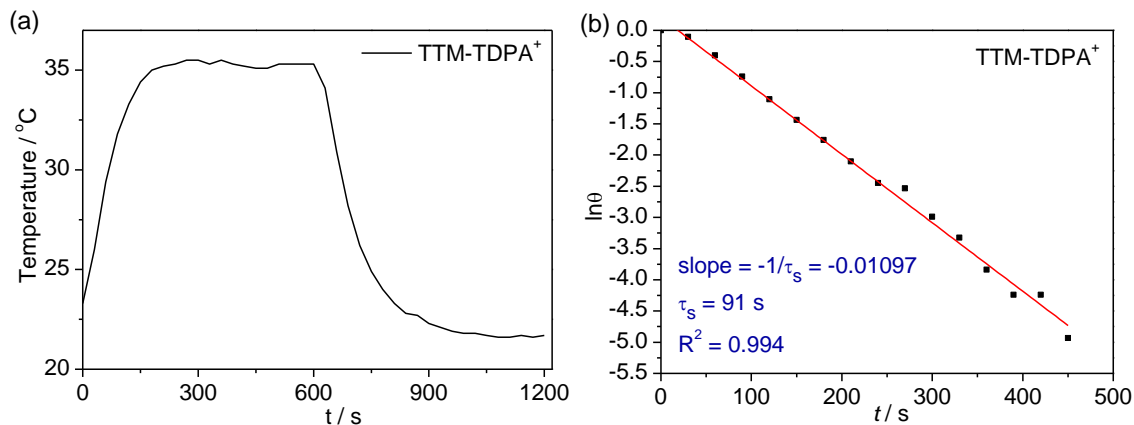

**Fig. S22.** (a) Heating and cooling curve of TTM-TDPA<sup>+</sup>. (b) Fitting linear of  $\ln\theta$ -t.

Photothermal conversion efficiency  $\eta$  of TTM-TDPA<sup>+</sup> was calculated by equations above. A fitting linear of  $\ln\theta$ -t was obtained by Eqs (3) and (4), by which  $\tau_s$  was calculated as 91 s. Thus,  $hS = 0.5802 / 91 = 6.38 \times 10^{-3} \text{ J}\cdot\text{K}^{-1}\cdot\text{S}^{-1}$ .  $\Delta T_{\text{sample}} = 12.2 \text{ }^\circ\text{C}$ .  $A_1 = 0.53555$ . Eventually,  $\eta_1 = 6.38 \times 10^{-3} \times (12.2 - 0.7) / [0.4 \times (1 - 10^{-0.53555})] = 26\%$ .

## 14. Fig. S23-S24. Stability of Neutral Radicals.

**Fig. S23.** Absorption intensity changes at  $\lambda_{\max}$  of TTM-2DPA, TTM-3DPA, TTM-BDPA, and TTM-TDPA in dilute DCM solutions exposed in ambient environment.

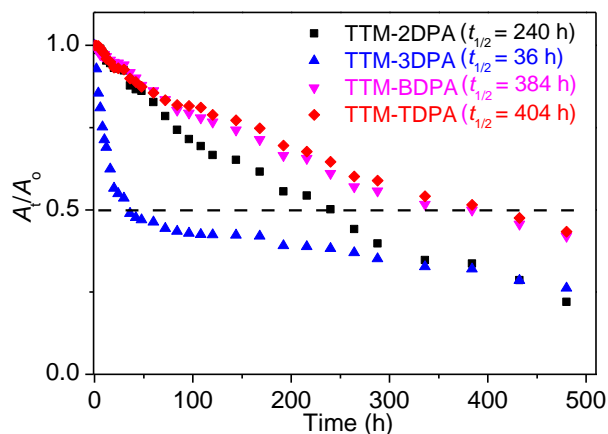

**Fig. S24.** Absorption spectra of TTM radical derivatives in DCM solution under the continuous natural light irradiation: (a) TTM-2DPA, (b) TTM-3DPA, (c) TTM-BDPA, and (d) TTM-TDPA in dilute DCM solutions exposed in ambient environment.

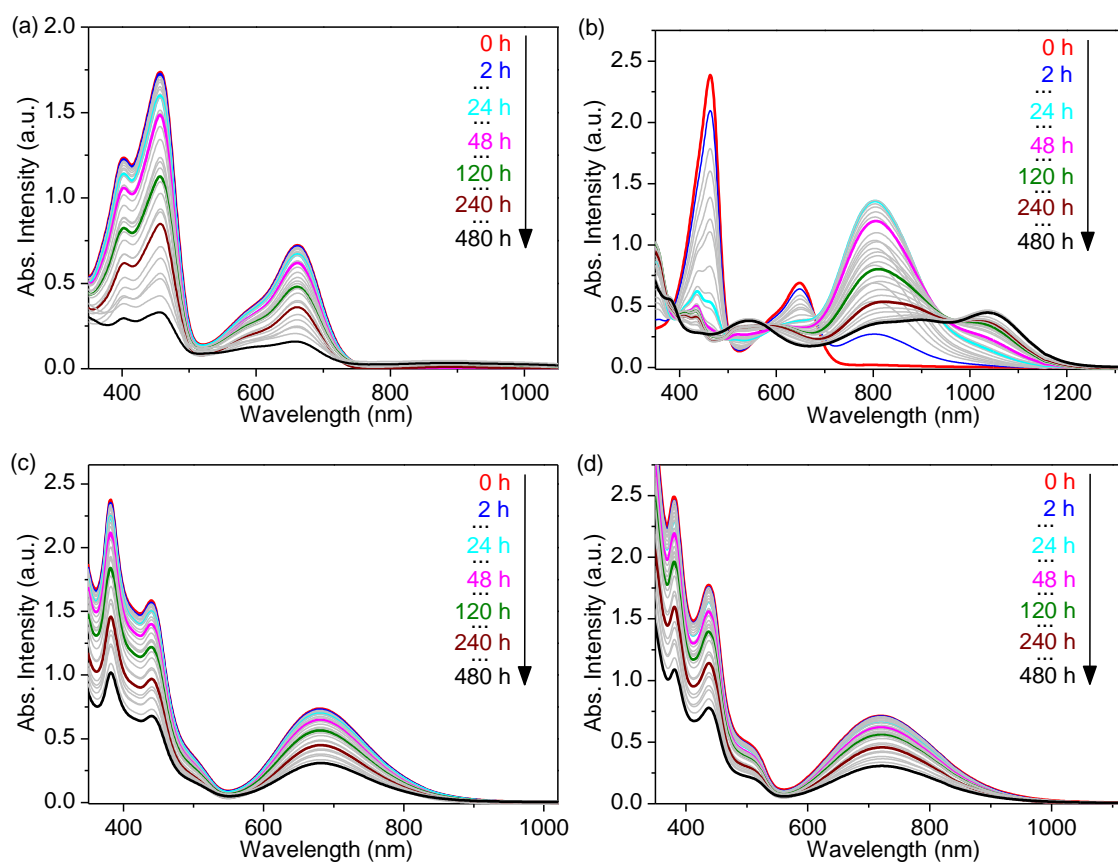

## 15. Fig. S25-S26. Stability of Oxidized Cations.

**Fig. S25.** Absorption intensity changes at  $\lambda_{\max}$  of TTM-2DPA<sup>+</sup>, TTM-3DPA<sup>+</sup>, TTM-BDPA<sup>+</sup>, and TTM-TDPA<sup>+</sup> in dilute DCM solutions exposed in ambient environment.

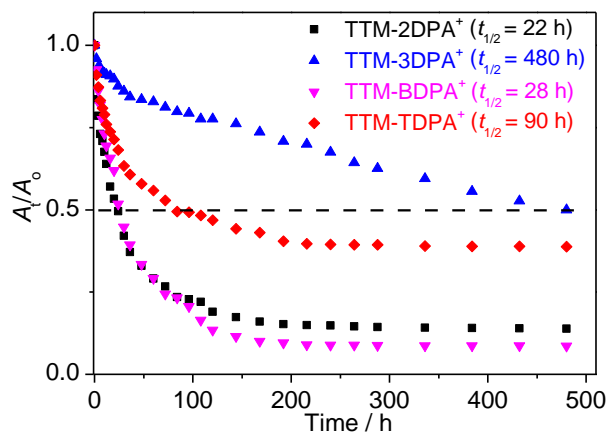

**Fig. S26.** Absorption spectra of TTM radical derivatives in DCM solution under the continuous natural light irradiation: (a) TTM-2DPA<sup>+</sup>, (b) TTM-3DPA<sup>+</sup>, (c) TTM-BDPA<sup>+</sup>, and (d) TTM-TDPA<sup>+</sup> in dilute DCM solutions exposed in ambient environment.

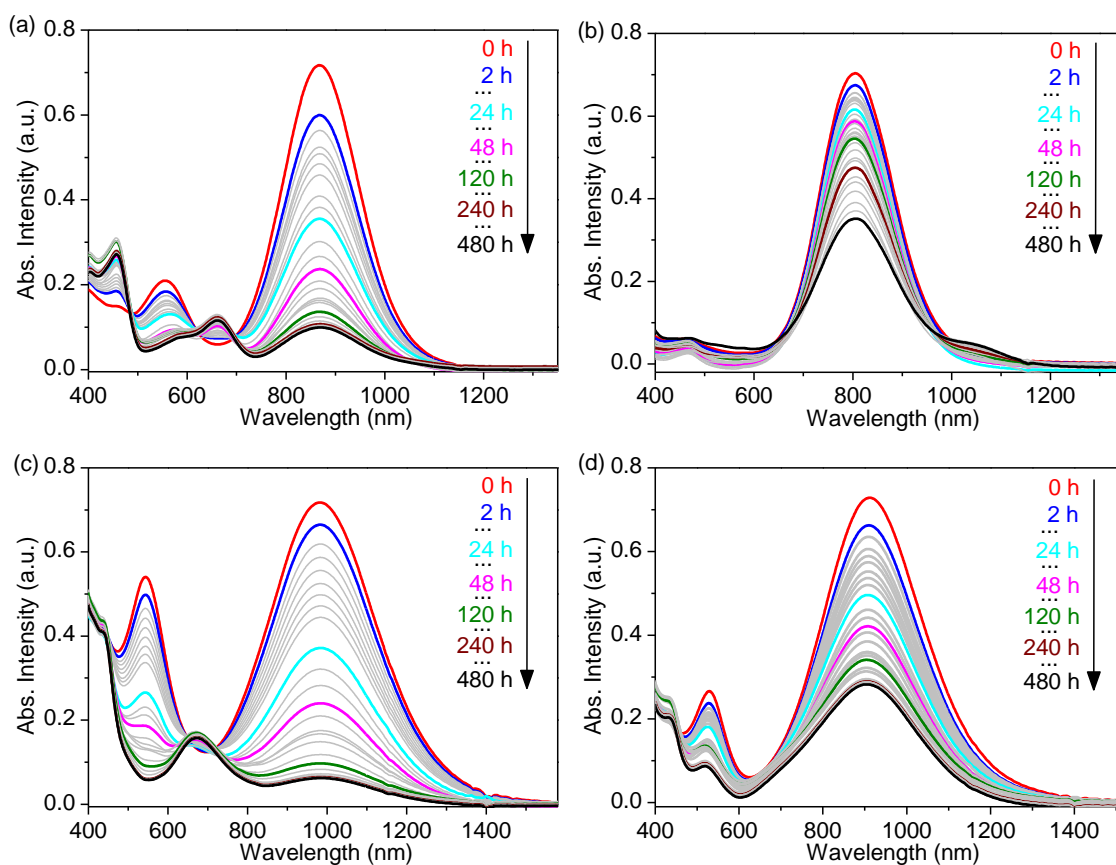



**16. Fig. S27. Photostability of NIR photothermal conversion materials TTM-BDPA and TTM-TDPA.**

**Fig. S27.** Absorption intensity changes at  $\lambda_{\text{irradiation}}$  of (a) **TTM-BDPA** and (b) **TTM-TDPA** in dilute DCM solutions under the continuous irradiation of 760 nm NIR light.

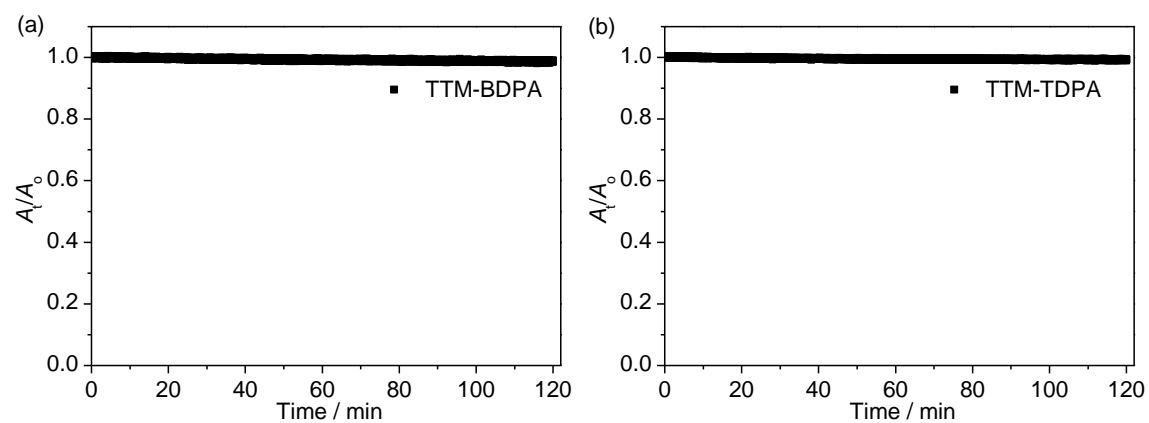

## 17. Table S1-S2. Single crystal data of TTM-BDPA.

**Table S1.** Single crystal data and structural refinements of TTM-BDPA.

|                          |                                                                                                                                        |
|--------------------------|----------------------------------------------------------------------------------------------------------------------------------------|
| Sum formula              | C <sub>43</sub> H <sub>25</sub> Cl <sub>8</sub> N <sub>2</sub>                                                                         |
| Formula weight           | 853.25                                                                                                                                 |
| Temperature              | 173 K                                                                                                                                  |
| Wavelength               | 1.34138 Å                                                                                                                              |
| Bond precision           | C-C = 0.0033 Å                                                                                                                         |
| Crystal system           | Monoclinic                                                                                                                             |
| Space group              | P121/n1                                                                                                                                |
| Cell                     | $a = 14.1818(6)$ Å, $b = 7.9814(4)$ Å,<br>$c = 39.7376(18)$ Å<br>$\alpha = 90^\circ$ , $\beta = 98.296(2)^\circ$ , $\gamma = 90^\circ$ |
| Volume (Å <sup>3</sup> ) | 4450.9(4)                                                                                                                              |
| Z                        | 4                                                                                                                                      |
| F (000)                  | 1732.0                                                                                                                                 |
| Tmin,Tmax                | 0.563, 0.786                                                                                                                           |
| Data completeness        | 0.998                                                                                                                                  |
| Theta(max)               | 57.019                                                                                                                                 |
| R(reflections)           | 0.0482(7231)                                                                                                                           |
| wR2(reflections)         | 0.1444(9082)                                                                                                                           |

**Table S2.** Selected bond lengths of **TTM-BDPA**.

| Bond        | Length/Å | Bond        | Length/Å |
|-------------|----------|-------------|----------|
| Cl(1)-C(29) | 1.734(2) | C(23)-C(24) | 1.380(3) |
| Cl(2)-C(27) | 1.737(3) | C(19)-C(24) | 1.393(3) |
| Cl(3)-C(33) | 1.733(3) | C(25)-C(26) | 1.391(3) |
| Cl(4)-C(35) | 1.734(3) | C(26)-C(27) | 1.373(4) |
| Cl(5)-C(37) | 1.731(3) | C(27)-C(28) | 1.408(3) |
| Cl(6)-C(39) | 1.729(2) | C(28)-C(29) | 1.405(3) |
| Cl(7)-C(41) | 1.734(2) | C(29)-C(30) | 1.374(3) |
| Cl(8)-C(43) | 1.735(3) | C(25)-C(30) | 1.394(3) |
| C(1)-C(2)   | 1.388(3) | C(31)-C(32) | 1.465(3) |
| C(2)-C(3)   | 1.385(4) | C(32)-C(33) | 1.397(3) |
| C(3)-C(4)   | 1.371(4) | C(33)-C(34) | 1.383(4) |
| C(4)-C(5)   | 1.379(4) | C(34)-C(35) | 1.367(4) |
| C(5)-C(6)   | 1.381(4) | C(35)-C(36) | 1.369(4) |
| C(7)-C(8)   | 1.394(3) | C(36)-C(37) | 1.383(4) |
| C(8)-C(9)   | 1.37     | C(32)-C(37) | 1.406(4) |
| C(9)-C(10)  | 1.39(2)  | C(31)-C(38) | 1.465(3) |
| C(10)-C(11) | 1.37(2)  | C(31)-C(28) | 1.456(3) |
| C(11)-C(12) | 1.37(2)  | C(38)-C(39) | 1.405(3) |
| C(7)-C(12)  | 1.39(2)  | C(39)-C(40) | 1.384(3) |
| C(13)-C(14) | 1.391(3) | C(40)-C(41) | 1.378(3) |
| C(14)-C(15) | 1.384(3) | C(41)-C(42) | 1.378(4) |
| C(15)-C(16) | 1.383(3) | C(42)-C(43) | 1.385(3) |
| C(16)-C(17) | 1.391(3) | C(38)-C(43) | 1.404(3) |
| C(17)-C(18) | 1.390(3) | C(1)-N(1)   | 1.413(3) |
| C(13)-C(18) | 1.392(3) | N(1)-C(13)  | 1.424(3) |
| C(19)-C(20) | 1.386(3) | C(7)-N(1)   | 1.422    |
| C(20)-C(21) | 1.387(3) | C(16)-N(2)  | 1.431(3) |
| C(21)-C(22) | 1.377(4) | C(25)-N(2)  | 1.404(3) |
| C(22)-C(23) | 1.377(3) | C(19)-N(2)  | 1.420(3) |

## 18. Table S3. Electrochemical data of the target neutral radicals.

Table S3. Electrochemical data of TTM-DPA, TTM-2DPA, TTM-3DPA, TTM-BDPA, and TTM-TDPA.

| Radical         | $E^1_{\text{ox}}$<br>(V) | $E^2_{\text{ox}}$<br>(V) | $E^3_{\text{ox}}$<br>(V) | $\Delta E^{1-2}_{\text{ox}}$ <sup>a</sup><br>(V) <sup>a</sup> | $E^1_{\text{red}}$<br>(V) | $E_{\text{SOMO}}$ <sup>b</sup><br>(eV) | $E_{\text{SUMO}}$ <sup>b</sup><br>(eV) | $E_{\text{g}}$<br>(eV) |
|-----------------|--------------------------|--------------------------|--------------------------|---------------------------------------------------------------|---------------------------|----------------------------------------|----------------------------------------|------------------------|
| <b>TTM-DPA</b>  | 0.20                     | -                        | -                        | -                                                             | -1.02                     | -4.92                                  | -3.86                                  | 1.06                   |
| <b>TTM-2DPA</b> | -0.05                    | 0.74                     | -                        | 0.79                                                          | -1.21                     | -4.67                                  | -3.70                                  | 0.97                   |
| <b>TTM-3DPA</b> | -0.21                    | 0.79                     | 1.08                     | 1.00                                                          | -1.36                     | -4.51                                  | -3.55                                  | 0.96                   |
| <b>TTM-BDPA</b> | -0.02                    | 0.79                     | -                        | 0.81                                                          | -1.12                     | -4.74                                  | -3.79                                  | 0.95                   |
| <b>TTM-TDPA</b> | -0.04                    | 0.71                     | 0.97                     | 0.75                                                          | -1.09                     | -4.67                                  | -3.78                                  | 0.89                   |

<sup>a</sup>  $\Delta E^{1-2}_{\text{ox}} = E^2_{\text{ox}} - E^1_{\text{ox}}$ .

<sup>b</sup> The SOMO and SUMO levels were determined from the first oxidation and reduction onset potentials which were calibrated with ferrocene.

## 19. Table S4. Calculated energy gap of the target neutral radicals.

**Table S4.** Calculated SOMO and SUMO energy levels, Energy gap, and Dipole Moment of the TTM radical derivatives.

| Radical         | $E_{\text{SOMO}}$<br>(eV) | $E_{\text{SUMO}}$<br>(eV) | $E_{\text{g}}^{\text{calcd}}$<br>(eV) | Dipole Moment<br>(Debye) |
|-----------------|---------------------------|---------------------------|---------------------------------------|--------------------------|
| <b>TTM-DPA</b>  | -5.05                     | -3.08                     | 1.97                                  | 4.95                     |
| <b>TTM-2DPA</b> | -4.71                     | -2.82                     | 1.89                                  | 4.25                     |
| <b>TTM-3DPA</b> | -4.43                     | -2.59                     | 1.84                                  | 0.10                     |
| <b>TTM-BDPA</b> | -4.86                     | -3.03                     | 1.83                                  | 5.78                     |
| <b>TTM-TDPA</b> | -4.70                     | -3.00                     | 1.70                                  | 6.40                     |

**20. Table S5. Calculated energies, oscillator strength and compositions of major electronic transitions of the target neutral radicals and their oxidized monocations.**

**Table S5.** Calculated absorption maxima, oscillator strength and compositions of major electronic transitions of the TTM radical derivatives and their oxidized monocations.

| Compound                    | $\lambda_{\text{abs}}^{\text{exp}}$<br>(nm) | $\lambda_{\text{abs}}^{\text{calcd}}$<br>(nm) | Osc. Strength | Major contributions                    |
|-----------------------------|---------------------------------------------|-----------------------------------------------|---------------|----------------------------------------|
| <b>TTM-2DPA</b>             | 650                                         | 619                                           | 0.23          | $\beta$ -HOMO $\rightarrow$ SUMO (95%) |
| <b>TTM-3DPA</b>             | 637                                         | 593                                           | 0.21          | $\beta$ -HOMO $\rightarrow$ SUMO (94%) |
| <b>TTM-BDPA</b>             | 675                                         | 708                                           | 0.18          | $\beta$ -HOMO $\rightarrow$ SUMO (93%) |
| <b>TTM-TDPA</b>             | 717                                         | 771                                           | 0.21          | $\beta$ -HOMO $\rightarrow$ SUMO (96%) |
| <b>TTM-2DPA<sup>+</sup></b> | 864                                         | 758                                           | 1.03          | HOMO $\rightarrow$ LUMO (71%)          |
| <b>TTM-3DPA<sup>+</sup></b> | 801                                         | 731                                           | 0.77          | HOMO $\rightarrow$ LUMO (70%)          |
| <b>TTM-BDPA<sup>+</sup></b> | 988                                         | 1015                                          | 0.72          | HOMO $\rightarrow$ LUMO (71%)          |
| <b>TTM-TDPA<sup>+</sup></b> | 907                                         | 970                                           | 0.97          | HOMO $\rightarrow$ LUMO (71%)          |

**21. Table S6-S13. Computational data of the neutral radicals and the oxidized monocations.**

**Table S6.** Computational data for **TTM-2DPA**. ( $E = -4985.06$  hartree).

| Centre Number | Atomic Symbol | Coordinates (Angstroms) |             |             |
|---------------|---------------|-------------------------|-------------|-------------|
|               |               | X                       | Y           | Z           |
| 1             | C             | 3.81614300              | -0.71090400 | 0.06334300  |
| 2             | C             | 3.55517900              | 0.33024200  | -0.84141200 |
| 3             | C             | 2.31297500              | 0.94476700  | -0.86342700 |
| 4             | C             | 1.24354800              | 0.60039000  | 0.00622300  |
| 5             | C             | 1.56200800              | -0.45102200 | 0.90783900  |
| 6             | C             | 2.78912100              | -1.09460900 | 0.94035100  |
| 7             | H             | 4.31748900              | 0.65115900  | -1.53969400 |
| 8             | H             | 2.95287900              | -1.88691400 | 1.65945100  |
| 9             | C             | -0.06501000             | 1.26694100  | -0.01950200 |
| 10            | C             | -0.13829100             | 2.74040100  | -0.04076700 |
| 11            | C             | 0.58726200              | 3.55936300  | 0.86282000  |
| 12            | C             | -0.93983600             | 3.45627100  | -0.96754400 |
| 13            | C             | 0.53248600              | 4.94947400  | 0.85130200  |
| 14            | C             | -1.02130300             | 4.84478700  | -0.99860000 |
| 15            | C             | -0.27795800             | 5.58273200  | -0.08426200 |
| 16            | H             | 1.09726500              | 5.52252400  | 1.57592000  |
| 17            | H             | -1.63839000             | 5.33741100  | -1.73952400 |
| 18            | C             | -1.29870000             | 0.47416500  | -0.02435800 |
| 19            | C             | -2.40511300             | 0.74458500  | 0.82634600  |
| 20            | C             | -1.50388300             | -0.63990500 | -0.88383400 |
| 21            | C             | -3.57330300             | -0.00046500 | 0.83483100  |
| 22            | C             | -2.66511300             | -1.39525300 | -0.90417400 |
| 23            | C             | -3.72673500             | -1.09009300 | -0.03719500 |
| 24            | H             | -4.35501200             | 0.24669600  | 1.54173800  |
| 25            | H             | -2.75863900             | -2.20529800 | -1.61616100 |
| 26            | C             | -6.16299300             | -1.24623000 | 0.26099900  |
| 27            | C             | -7.05212000             | -1.87564800 | 1.14433000  |
| 28            | C             | -6.52754200             | -0.02709000 | -0.32991700 |
| 29            | C             | -8.28703400             | -1.29405700 | 1.42601400  |
| 30            | H             | -6.76988800             | -2.81746100 | 1.60421800  |
| 31            | C             | -7.75724600             | 0.55568000  | -0.02823100 |
| 32            | H             | -5.84585900             | 0.45741800  | -1.02197700 |
| 33            | C             | -8.64461700             | -0.07485400 | 0.84654200  |
| 34            | H             | -8.96651200             | -1.79188900 | 2.11255900  |
| 35            | H             | -8.02667900             | 1.50086300  | -0.49166200 |
| 36            | H             | -9.60488200             | 0.37905400  | 1.07386300  |
| 37            | C             | -4.86842100             | -3.24551900 | -0.34959200 |
| 38            | C             | -5.80301000             | -3.79594200 | -1.23878200 |
| 39            | C             | -3.90935000             | -4.07984800 | 0.24421700  |
| 40            | C             | -5.77844800             | -5.16014800 | -1.52324700 |
| 41            | H             | -6.54363200             | -3.15088900 | -1.70089300 |
| 42            | C             | -3.88162000             | -5.43977300 | -0.06013000 |

---

|    |    |             |             |             |
|----|----|-------------|-------------|-------------|
| 43 | H  | -3.19091300 | -3.65872500 | 0.94056900  |
| 44 | C  | -4.81659500 | -5.98815900 | -0.94066800 |
| 45 | H  | -6.50807100 | -5.57377000 | -2.21422800 |
| 46 | H  | -3.13290300 | -6.07455700 | 0.40596800  |
| 47 | H  | -4.79616400 | -7.04970200 | -1.16992700 |
| 48 | C  | 5.83115500  | -1.50127300 | -1.10652200 |
| 49 | C  | 5.22493500  | -1.96178800 | -2.28494100 |
| 50 | C  | 7.20174800  | -1.20395500 | -1.10914000 |
| 51 | C  | 5.97892900  | -2.10781100 | -3.44814300 |
| 52 | H  | 4.16638600  | -2.20249300 | -2.28325000 |
| 53 | C  | 7.95132000  | -1.37030900 | -2.27238600 |
| 54 | H  | 7.67131300  | -0.84483100 | -0.19880000 |
| 55 | C  | 7.34494800  | -1.81762600 | -3.44810200 |
| 56 | H  | 5.49651800  | -2.46374300 | -4.35443100 |
| 57 | H  | 9.01233900  | -1.13578500 | -2.26090200 |
| 58 | H  | 7.93067500  | -1.93907500 | -4.35474900 |
| 59 | C  | 5.59656800  | -1.85972200 | 1.31408900  |
| 60 | C  | 6.15834000  | -3.14408300 | 1.35724600  |
| 61 | C  | 5.57473000  | -1.07911900 | 2.47963600  |
| 62 | C  | 6.69270300  | -3.63422600 | 2.54757500  |
| 63 | H  | 6.17362700  | -3.74990000 | 0.45672500  |
| 64 | C  | 6.09514900  | -1.58476900 | 3.66973400  |
| 65 | H  | 5.15043400  | -0.08044100 | 2.44671500  |
| 66 | C  | 6.66006600  | -2.86128400 | 3.71015700  |
| 67 | H  | 7.12490500  | -4.63109300 | 2.56724600  |
| 68 | H  | 6.07065700  | -0.97007600 | 4.56545700  |
| 69 | H  | 7.07111200  | -3.24915900 | 4.63775500  |
| 70 | Cl | 0.40834200  | -0.97343500 | 2.13036000  |
| 71 | Cl | 2.09973100  | 2.16364700  | -2.11455300 |
| 72 | Cl | -0.36381400 | 7.33271900  | -0.11119100 |
| 73 | Cl | -1.83385900 | 2.62168500  | -2.22762000 |
| 74 | Cl | 1.55520400  | 2.85492200  | 2.14734300  |
| 75 | Cl | -0.31059700 | -1.06886900 | -2.10451800 |
| 76 | Cl | -2.31127200 | 2.00519500  | 2.05043100  |
| 77 | N  | 5.06778800  | -1.35009700 | 0.09019300  |
| 78 | N  | -4.90664200 | -1.85203000 | -0.04285100 |

---



**Table S7.** Computational data for **TTM-3DPA**. ( $E = -5042.91$  hartree).

| Centre Number | Atomic Symbol | Coordinates (Angstroms) |             |             |
|---------------|---------------|-------------------------|-------------|-------------|
|               |               | X                       | Y           | Z           |
| 1             | C             | 4.35610900              | 0.00032100  | -0.00002500 |
| 2             | C             | 3.63404600              | 0.80271600  | -0.89625300 |
| 3             | C             | 2.24760000              | 0.78505800  | -0.89170500 |
| 4             | C             | 1.46888700              | 0.00007500  | -0.00003600 |
| 5             | C             | 2.24773100              | -0.78478000 | 0.89163400  |
| 6             | C             | 3.63418100              | -0.80217900 | 0.89620800  |
| 7             | H             | 4.15445800              | 1.42933700  | -1.60933900 |
| 8             | H             | 4.15470100              | -1.42866300 | 1.60933700  |
| 9             | C             | -0.00133300             | -0.00001700 | -0.00000900 |
| 10            | C             | -0.73554700             | 1.27141300  | -0.00946200 |
| 11            | C             | -0.43052300             | 2.35431400  | 0.85869400  |
| 12            | C             | -1.81997500             | 1.53839300  | -0.88831000 |
| 13            | C             | -1.11787600             | 3.55796300  | 0.86367900  |
| 14            | C             | -2.51737600             | 2.73604100  | -0.91312200 |
| 15            | C             | -2.17818800             | 3.77238400  | -0.02998600 |
| 16            | H             | -0.84823200             | 4.32093700  | 1.58289300  |
| 17            | H             | -3.30779300             | 2.87574900  | -1.63965200 |
| 18            | C             | -0.73543900             | -1.27150600 | 0.00945400  |
| 19            | C             | -1.81970900             | -1.53869200 | 0.88842400  |
| 20            | C             | -0.43037000             | -2.35430000 | -0.85882700 |
| 21            | C             | -2.51697700             | -2.73641600 | 0.91318900  |
| 22            | C             | -1.11761900             | -3.55800200 | -0.86387800 |
| 23            | C             | -2.17784100             | -3.77260400 | 0.02985000  |
| 24            | H             | -3.30724900             | -2.87630400 | 1.63984400  |
| 25            | H             | -0.84794300             | -4.32090300 | -1.58316600 |
| 26            | C             | -4.27499300             | -5.01865100 | 0.33955300  |
| 27            | C             | -4.78856400             | -5.98238300 | 1.22021300  |
| 28            | C             | -5.14877100             | -4.09263300 | -0.25058700 |
| 29            | C             | -6.15370500             | -6.01963500 | 1.49850900  |
| 30            | H             | -4.11394000             | -6.69708700 | 1.68085800  |
| 31            | C             | -6.50978000             | -4.12666200 | 0.04788700  |
| 32            | H             | -4.75676700             | -3.35101800 | -0.93952000 |
| 33            | C             | -7.02094800             | -5.09100400 | 0.91910900  |
| 34            | H             | -6.53758800             | -6.77145200 | 2.18293000  |
| 35            | H             | -7.17453300             | -3.40284000 | -0.41590500 |
| 36            | H             | -8.08334400             | -5.11867900 | 1.14376200  |
| 37            | C             | -2.20856500             | -6.21554000 | -0.25075700 |
| 38            | C             | -2.79342700             | -7.15334000 | -1.11480300 |
| 39            | C             | -0.96389600             | -6.50067600 | 0.33124000  |
| 40            | C             | -2.14418600             | -8.35668100 | -1.38478400 |
| 41            | H             | -3.75418900             | -6.93314100 | -1.56929400 |
| 42            | C             | -0.31404500             | -7.69899000 | 0.04086000  |
| 43            | H             | -0.51201200             | -5.78162700 | 1.00728400  |
| 44            | C             | -0.90055000             | -8.63490900 | -0.81374400 |
| 45            | H             | -2.60882500             | -9.07373300 | -2.05633400 |
| 46            | H             | 0.64994200              | -7.90586300 | 0.49781600  |

---

|    |    |             |             |             |
|----|----|-------------|-------------|-------------|
| 47 | H  | -0.39409200 | -9.57071600 | -1.03207300 |
| 48 | C  | 6.48689000  | 0.16647000  | -1.21844000 |
| 49 | C  | 6.11643800  | -0.54557600 | -2.36947900 |
| 50 | C  | 7.58559600  | 1.03704100  | -1.27420300 |
| 51 | C  | 6.82768200  | -0.37666100 | -3.55616300 |
| 52 | H  | 5.27268400  | -1.22727800 | -2.32810600 |
| 53 | C  | 8.30199400  | 1.18531200  | -2.46049100 |
| 54 | H  | 7.87180900  | 1.59187300  | -0.38629900 |
| 55 | C  | 7.92567000  | 0.48470000  | -3.60837400 |
| 56 | H  | 6.52822600  | -0.93347900 | -4.43999700 |
| 57 | H  | 9.15079300  | 1.86339900  | -2.48901400 |
| 58 | H  | 8.48173400  | 0.60842700  | -4.53324200 |
| 59 | C  | 6.48678500  | -0.16556400 | 1.21853100  |
| 60 | C  | 7.58542800  | -1.03619300 | 1.27437700  |
| 61 | C  | 6.11621700  | 0.54649400  | 2.36951700  |
| 62 | C  | 8.30167700  | -1.18451900 | 2.46074900  |
| 63 | H  | 7.87169100  | -1.59101000 | 0.38647900  |
| 64 | C  | 6.82731500  | 0.37752800  | 3.55628800  |
| 65 | H  | 5.27250100  | 1.22823200  | 2.32802700  |
| 66 | C  | 7.92524700  | -0.48389500 | 3.60859300  |
| 67 | H  | 9.15043900  | -1.86264600 | 2.48939300  |
| 68 | H  | 6.52780000  | 0.93434700  | 4.44009900  |
| 69 | H  | 8.48121200  | -0.60768000 | 4.53351300  |
| 70 | Cl | 1.48047000  | -1.76481800 | 2.13676900  |
| 71 | Cl | 1.48018100  | 1.76501500  | -2.13681500 |
| 72 | Cl | -2.28348000 | 0.37595500  | -2.12675100 |
| 73 | Cl | 0.79765800  | 2.18795500  | 2.10898300  |
| 74 | Cl | 0.79773800  | -2.18770700 | -2.10915500 |
| 75 | Cl | -2.28307500 | -0.37647700 | 2.12709400  |
| 76 | N  | 5.76445600  | 0.00047900  | 0.00000700  |
| 77 | N  | -2.88081200 | -4.99168600 | 0.04001900  |
| 78 | C  | -4.27556700 | 5.01804700  | -0.33959700 |
| 79 | C  | -4.78948100 | 5.98159000  | -1.22027200 |
| 80 | C  | -5.14904800 | 4.09187600  | 0.25073300  |
| 81 | C  | -6.15465600 | 6.01847100  | -1.49841800 |
| 82 | H  | -4.11508400 | 6.69643900  | -1.68102900 |
| 83 | C  | -6.51009900 | 4.12553000  | -0.04758900 |
| 84 | H  | -4.75676400 | 3.35044800  | 0.93972100  |
| 85 | C  | -7.02160200 | 5.08965800  | -0.91885000 |
| 86 | H  | -6.53881300 | 6.77013800  | -2.18285200 |
| 87 | H  | -7.17460500 | 3.40157800  | 0.41635400  |
| 88 | H  | -8.08402300 | 5.11705000  | -1.14341400 |
| 89 | C  | -2.20943400 | 6.21541200  | 0.25054000  |
| 90 | C  | -0.96483900 | 6.50093000  | -0.33144200 |
| 91 | C  | -2.79459100 | 7.15307700  | 1.11454200  |
| 92 | C  | -0.31535700 | 7.69943500  | -0.04105800 |
| 93 | H  | -0.51272400 | 5.78202700  | -1.00748900 |
| 94 | C  | -2.14571700 | 8.35661200  | 1.38453000  |
| 95 | H  | -3.75532500 | 6.93262100  | 1.56898000  |
| 96 | C  | -0.90214300 | 8.63519700  | 0.81353200  |

---

---

|     |   |             |            |             |
|-----|---|-------------|------------|-------------|
| 97  | H | 0.64857600  | 7.90657700 | -0.49800600 |
| 98  | H | -2.61060300 | 9.07353400 | 2.05604800  |
| 99  | H | -0.39594400 | 9.57113900 | 1.03188400  |
| 100 | N | -2.88136800 | 4.99139300 | -0.04020600 |

---

**Table S8.** Computational data for **TTM-BDPA**. ( $E = -5444.65$  hartree).

| Centre<br>Number | Atomic<br>Symbol | Coordinates (Angstroms) |             |             |
|------------------|------------------|-------------------------|-------------|-------------|
|                  |                  | X                       | Y           | Z           |
| 1                | C                | 3.55075800              | 4.70024300  | -0.34643900 |
| 2                | C                | 4.18435500              | 4.06813800  | 0.71765400  |
| 3                | C                | 4.10125900              | 2.68341300  | 0.82359100  |
| 4                | C                | 3.40558900              | 1.86896100  | -0.10678500 |
| 5                | C                | 2.78767800              | 2.58199200  | -1.16720800 |
| 6                | C                | 2.84717100              | 3.96599200  | -1.29494200 |
| 7                | H                | 4.71712100              | 4.64031100  | 1.46681800  |
| 8                | H                | 2.36915000              | 4.45598500  | -2.13389200 |
| 9                | C                | 3.33444900              | 0.39988000  | 0.01012200  |
| 10               | C                | 4.57150800              | -0.37235900 | 0.23382600  |
| 11               | C                | 5.74502800              | -0.19010000 | -0.54255700 |
| 12               | C                | 4.68565000              | -1.35508300 | 1.25170800  |
| 13               | C                | 6.92049400              | -0.90446800 | -0.33378600 |
| 14               | C                | 5.84476500              | -2.08997000 | 1.47894100  |
| 15               | C                | 6.95862000              | -1.85499000 | 0.68025100  |
| 16               | H                | 7.78116000              | -0.73352000 | -0.96820600 |
| 17               | H                | 5.87968200              | -2.81689500 | 2.28068100  |
| 18               | C                | 2.04687000              | -0.28568100 | -0.09485300 |
| 19               | C                | 1.84486200              | -1.45296700 | -0.88419400 |
| 20               | C                | 0.87256200              | 0.14843800  | 0.58210800  |
| 21               | C                | 0.63137500              | -2.10954300 | -0.99563200 |
| 22               | C                | -0.35051000             | -0.49416700 | 0.49606600  |
| 23               | C                | -0.49819800             | -1.64340300 | -0.29999200 |
| 24               | H                | 0.55239800              | -2.96728100 | -1.65099600 |
| 25               | H                | -1.18599600             | -0.12248100 | 1.07495700  |
| 26               | C                | -1.80421500             | -3.69717200 | -0.66528200 |
| 27               | C                | -2.70008500             | -4.18406700 | -1.62792600 |
| 28               | C                | -1.00304200             | -4.60039100 | 0.04932300  |
| 29               | C                | -2.79081000             | -5.55373000 | -1.86910400 |
| 30               | H                | -3.32002700             | -3.48524900 | -2.18057100 |
| 31               | C                | -1.08898000             | -5.96715900 | -0.21052900 |
| 32               | H                | -0.31852400             | -4.22771000 | 0.80493900  |
| 33               | C                | -1.98398200             | -6.45152700 | -1.16683100 |
| 34               | H                | -3.48813500             | -5.91825600 | -2.61853400 |
| 35               | H                | -0.46231700             | -6.65619100 | 0.34910000  |
| 36               | H                | -2.05301900             | -7.51785600 | -1.36156100 |
| 37               | C                | -2.95245900             | -1.56911400 | -0.23847000 |
| 38               | C                | -3.94680800             | -2.03874400 | 0.63071900  |
| 39               | C                | -3.18795800             | -0.38683200 | -0.95480200 |
| 40               | C                | -5.14768200             | -1.35303700 | 0.77195500  |
| 41               | H                | -3.78187000             | -2.95782200 | 1.18462800  |
| 42               | C                | -4.37422100             | 0.31890300  | -0.78875200 |
| 43               | H                | -2.42793700             | -0.00979500 | -1.63241600 |
| 44               | C                | -5.38002500             | -0.15545300 | 0.07217100  |
| 45               | H                | -5.91129800             | -1.73909200 | 1.43889700  |
| 46               | H                | -4.53187400             | 1.24024500  | -1.33934700 |

---

|    |    |              |             |             |
|----|----|--------------|-------------|-------------|
| 47 | Cl | 1.96368600   | 1.74050000  | -2.46894100 |
| 48 | Cl | 4.84324600   | 1.99039000  | 2.25505100  |
| 49 | Cl | 8.42753700   | -2.76791500 | 0.95518200  |
| 50 | Cl | 3.37210600   | -1.65435200 | 2.37735800  |
| 51 | Cl | 5.76350300   | 0.90904000  | -1.91050300 |
| 52 | Cl | 0.93034900   | 1.49741700  | 1.71044100  |
| 53 | Cl | 3.13238800   | -2.08305900 | -1.90452100 |
| 54 | N  | -1.73221800  | -2.29548700 | -0.40177000 |
| 55 | Cl | 3.63973600   | 6.44295000  | -0.49422100 |
| 56 | N  | -6.59488500  | 0.55300600  | 0.23013400  |
| 57 | C  | -7.19935400  | 1.19953900  | -0.88521700 |
| 58 | C  | -7.28035900  | 0.55209800  | -2.12825400 |
| 59 | C  | -7.72862900  | 2.49302400  | -0.75426200 |
| 60 | C  | -7.86865400  | 1.19298400  | -3.21711200 |
| 61 | H  | -6.88182500  | -0.45210400 | -2.23352200 |
| 62 | C  | -8.33171000  | 3.11855300  | -1.84388100 |
| 63 | H  | -7.66440200  | 3.00062000  | 0.20296300  |
| 64 | C  | -8.40161100  | 2.47668300  | -3.08214600 |
| 65 | H  | -7.92319700  | 0.67761500  | -4.17247200 |
| 66 | H  | -8.73637900  | 4.12024300  | -1.72539800 |
| 67 | H  | -8.86583900  | 2.97034500  | -3.93103900 |
| 68 | C  | -7.22005700  | 0.62770100  | 1.50759500  |
| 69 | C  | -6.46108000  | 0.88578600  | 2.65999600  |
| 70 | C  | -8.60698100  | 0.44948300  | 1.62964700  |
| 71 | C  | -7.07899900  | 0.95192400  | 3.90750000  |
| 72 | H  | -5.38957800  | 1.03495400  | 2.57105800  |
| 73 | C  | -9.21862300  | 0.53588400  | 2.87897300  |
| 74 | H  | -9.19805200  | 0.24534200  | 0.74246000  |
| 75 | C  | -8.46012900  | 0.78211200  | 4.02537600  |
| 76 | H  | -6.47690500  | 1.15305200  | 4.78966700  |
| 77 | H  | -10.29364200 | 0.39585300  | 2.95613000  |
| 78 | H  | -8.93934800  | 0.84190800  | 4.99832400  |

---

**Table S9.** Computational data for **TTM-TDPA**. ( $E = -5062.10$  hartree).

| Centre Number | Atomic Symbol | Coordinates (Angstroms) |             |             |
|---------------|---------------|-------------------------|-------------|-------------|
|               |               | X                       | Y           | Z           |
| 1             | C             | 6.12917200              | -4.01524900 | 0.98137000  |
| 2             | C             | 6.51697300              | -3.31575400 | -0.15594000 |
| 3             | C             | 5.87902200              | -2.11694800 | -0.45849200 |
| 4             | C             | 4.84896200              | -1.55634500 | 0.34002700  |
| 5             | C             | 4.50956600              | -2.32255700 | 1.48573500  |
| 6             | C             | 5.12392000              | -3.52801500 | 1.80947700  |
| 7             | H             | 7.28701100              | -3.70302700 | -0.81132100 |
| 8             | H             | 4.83436500              | -4.06289300 | 2.70529800  |
| 9             | C             | 4.18803900              | -0.27783300 | 0.01512400  |
| 10            | C             | 5.01102400              | 0.90417700  | -0.30492000 |
| 11            | C             | 6.09981100              | 1.32701900  | 0.50048600  |
| 12            | C             | 4.78110200              | 1.70747000  | -1.45242100 |
| 13            | C             | 6.88976000              | 2.43284700  | 0.20241300  |
| 14            | C             | 5.54866700              | 2.82289600  | -1.77187600 |
| 15            | C             | 6.60331000              | 3.17606900  | -0.93719700 |
| 16            | H             | 7.69928700              | 2.71734700  | 0.86287000  |
| 17            | H             | 5.33662600              | 3.39029100  | -2.66939200 |
| 18            | C             | 2.72975500              | -0.18287000 | 0.01040800  |
| 19            | C             | 2.01280200              | 0.88607100  | 0.61955300  |
| 20            | C             | 1.88413200              | -1.14994400 | -0.60379200 |
| 21            | C             | 0.63272600              | 0.98649900  | 0.62609900  |
| 22            | C             | 0.50261900              | -1.07035300 | -0.61958500 |
| 23            | C             | -0.15775600             | 0.00556000  | 0.00050000  |
| 24            | H             | 0.16440000              | 1.81070000  | 1.14820500  |
| 25            | H             | -0.06512600             | -1.82733300 | -1.14485900 |
| 26            | C             | -2.20107500             | 1.36836700  | 0.07100200  |
| 27            | C             | -3.23891500             | 1.58219600  | 0.98837700  |
| 28            | C             | -1.83140100             | 2.41685000  | -0.78368000 |
| 29            | C             | -3.88433700             | 2.81167100  | 1.05646500  |
| 30            | H             | -3.53012000             | 0.78158000  | 1.66131100  |
| 31            | C             | -2.47606900             | 3.64697700  | -0.71758600 |
| 32            | H             | -1.04289900             | 2.26108400  | -1.51370400 |
| 33            | C             | -3.51388600             | 3.86747300  | 0.20502000  |
| 34            | H             | -4.67481100             | 2.96374100  | 1.78384700  |
| 35            | H             | -2.18515100             | 4.44241000  | -1.39556300 |
| 36            | C             | -2.36424900             | -1.07511800 | -0.08564800 |
| 37            | C             | -3.42611800             | -1.13996300 | -0.99876200 |
| 38            | C             | -2.13505400             | -2.17218200 | 0.75781500  |
| 39            | C             | -4.24218600             | -2.26341800 | -1.06048900 |
| 40            | H             | -3.62142500             | -0.29455800 | -1.65121800 |
| 41            | C             | -2.92890400             | -3.31035900 | 0.67332200  |
| 42            | H             | -1.31832500             | -2.13825300 | 1.47240200  |
| 43            | C             | -4.00296400             | -3.37420300 | -0.23200800 |
| 44            | H             | -5.06739200             | -2.28976000 | -1.76434000 |
| 45            | H             | -2.72624800             | -4.15486100 | 1.32349100  |
| 46            | Cl            | 3.32718300              | -1.74462400 | 2.64763200  |

---

|    |    |             |             |             |
|----|----|-------------|-------------|-------------|
| 47 | Cl | 6.36518300  | -1.36375500 | -1.96733500 |
| 48 | Cl | 7.58294300  | 4.57486900  | -1.32647300 |
| 49 | Cl | 3.54094600  | 1.28744500  | -2.62188700 |
| 50 | Cl | 6.47430100  | 0.51829600  | 2.01242200  |
| 51 | Cl | 2.56572000  | -2.48542200 | -1.52532000 |
| 52 | Cl | 2.85599300  | 2.12208000  | 1.54648700  |
| 53 | N  | -1.55260200 | 0.09736600  | -0.00383500 |
| 54 | Cl | 6.91664000  | -5.52906300 | 1.37621600  |
| 55 | N  | -4.82335400 | -4.52552700 | -0.30677700 |
| 56 | C  | -5.16981300 | -5.23747900 | 0.87639500  |
| 57 | C  | -5.55689600 | -4.54872100 | 2.03694700  |
| 58 | C  | -5.13380000 | -6.64065900 | 0.89647500  |
| 59 | C  | -5.88897700 | -5.25198800 | 3.19345100  |
| 60 | H  | -5.59604700 | -3.46398900 | 2.02538400  |
| 61 | C  | -5.48556100 | -7.33574100 | 2.05204700  |
| 62 | H  | -4.83013000 | -7.17866600 | 0.00407400  |
| 63 | C  | -5.86016400 | -6.64810100 | 3.20833100  |
| 64 | H  | -6.18639600 | -4.70324100 | 4.08324200  |
| 65 | H  | -5.45198300 | -8.42205300 | 2.05047400  |
| 66 | H  | -6.12645500 | -7.19311700 | 4.10937800  |
| 67 | C  | -5.30582800 | -4.98037000 | -1.56683300 |
| 68 | C  | -4.45543400 | -5.02620500 | -2.68292800 |
| 69 | C  | -6.63971200 | -5.39427700 | -1.70826200 |
| 70 | C  | -4.93627900 | -5.46679600 | -3.91463400 |
| 71 | H  | -3.42015200 | -4.71725200 | -2.57812700 |
| 72 | C  | -7.10651000 | -5.85086900 | -2.93949400 |
| 73 | H  | -7.30302200 | -5.35666900 | -0.84992500 |
| 74 | C  | -6.26152000 | -5.88567600 | -4.05079900 |
| 75 | H  | -4.26436200 | -5.49663000 | -4.76836300 |
| 76 | H  | -8.14192100 | -6.16819500 | -3.03167300 |
| 77 | H  | -6.63068300 | -6.23571700 | -5.01051600 |
| 78 | N  | -4.16904600 | 5.12050500  | 0.27400600  |
| 79 | C  | -5.57105900 | 5.18487400  | 0.51207700  |
| 80 | C  | -6.09579400 | 6.12596700  | 1.41195200  |
| 81 | C  | -6.44922500 | 4.31427900  | -0.15291500 |
| 82 | C  | -7.46997800 | 6.19584200  | 1.63324400  |
| 83 | H  | -5.42168600 | 6.79874600  | 1.93251500  |
| 84 | C  | -7.82020800 | 4.37940100  | 0.08881000  |
| 85 | H  | -6.05119900 | 3.59098200  | -0.85766500 |
| 86 | C  | -8.34036300 | 5.32166600  | 0.97867100  |
| 87 | H  | -7.85943500 | 6.93049800  | 2.33313600  |
| 88 | H  | -8.48590800 | 3.69820600  | -0.43477800 |
| 89 | H  | -9.41020500 | 5.37457800  | 1.15895200  |
| 90 | C  | -3.42855400 | 6.32576900  | 0.10786400  |
| 91 | C  | -3.93571000 | 7.36602900  | -0.68648200 |
| 92 | C  | -2.18572700 | 6.49279000  | 0.73894900  |
| 93 | C  | -3.21494600 | 8.54926900  | -0.83757600 |
| 94 | H  | -4.89392700 | 7.24064200  | -1.18069500 |
| 95 | C  | -1.46348400 | 7.67221200  | 0.56665700  |
| 96 | H  | -1.79198000 | 5.69616300  | 1.36231400  |

---

---

|     |   |             |            |             |
|-----|---|-------------|------------|-------------|
| 97  | C | -1.97379200 | 8.70883900 | -0.21771300 |
| 98  | H | -3.62188000 | 9.34498700 | -1.45602600 |
| 99  | H | -0.50254400 | 7.78482800 | 1.06165200  |
| 100 | H | -1.41136300 | 9.62947300 | -0.34393900 |

---



**Table S10.** Computational data for **TTM-2DPA<sup>+</sup>**. ( $E = -4984.86$  hartree).

| Centre<br>Number | Atomic<br>Symbol | Coordinates (Angstroms) |             |             |
|------------------|------------------|-------------------------|-------------|-------------|
|                  |                  | X                       | Y           | Z           |
| 1                | C                | -0.19260800             | 5.45698600  | 0.03827900  |
| 2                | C                | 0.59547000              | 4.79310400  | 0.97618300  |
| 3                | C                | 0.64450200              | 3.40481700  | 0.95389000  |
| 4                | C                | -0.09173400             | 2.62700800  | 0.02295200  |
| 5                | C                | -0.88193800             | 3.36039200  | -0.89973500 |
| 6                | C                | -0.93185300             | 4.74896600  | -0.90690200 |
| 7                | H                | 1.15227700              | 5.34691900  | 1.72174800  |
| 8                | H                | -1.52638800             | 5.26989400  | -1.64701700 |
| 9                | C                | -0.03875500             | 1.14883700  | 0.01440400  |
| 10               | C                | 1.23896100              | 0.49008500  | -0.01418100 |
| 11               | C                | 2.35097200              | 0.94272000  | -0.80613600 |
| 12               | C                | 1.54220300              | -0.65544500 | 0.80337300  |
| 13               | C                | 3.58710800              | 0.34136900  | -0.79736700 |
| 14               | C                | 2.78600400              | -1.23799200 | 0.86067100  |
| 15               | C                | 3.85052800              | -0.76203800 | 0.05309900  |
| 16               | H                | 4.36297000              | 0.72292600  | -1.44650400 |
| 17               | H                | 2.94724200              | -2.07067400 | 1.53105900  |
| 18               | C                | -1.26509700             | 0.40521100  | 0.03415100  |
| 19               | C                | -1.48791000             | -0.75338100 | -0.79364800 |
| 20               | C                | -2.40962300             | 0.77870100  | 0.82439100  |
| 21               | C                | -2.68804900             | -1.41881900 | -0.85608600 |
| 22               | C                | -3.60789800             | 0.10825700  | 0.79181800  |
| 23               | C                | -3.79018800             | -1.00862200 | -0.06285000 |
| 24               | H                | -2.80466700             | -2.23368100 | -1.55766500 |
| 25               | H                | -4.40145200             | 0.40889100  | 1.46264600  |
| 26               | C                | -5.08665900             | -3.00586800 | -0.64286800 |
| 27               | C                | -6.01472600             | -3.28302600 | -1.65348700 |
| 28               | C                | -4.28622500             | -4.02806200 | -0.11685900 |
| 29               | C                | -6.13110600             | -4.58269400 | -2.14260000 |
| 30               | H                | -6.63534600             | -2.48511700 | -2.04866600 |
| 31               | C                | -4.40679000             | -5.32377300 | -0.61777900 |
| 32               | H                | -3.58641500             | -3.80879900 | 0.68393100  |
| 33               | C                | -5.32766400             | -5.60413000 | -1.62945100 |
| 34               | H                | -6.84851200             | -4.79589300 | -2.92930500 |
| 35               | H                | -3.78922700             | -6.11638400 | -0.20594300 |
| 36               | H                | -5.42299700             | -6.61542500 | -2.01299200 |
| 37               | C                | -6.20530600             | -1.05440500 | 0.34436100  |
| 38               | C                | -7.00643800             | -1.72512600 | 1.27581600  |
| 39               | C                | -6.60114900             | 0.18879900  | -0.16558200 |
| 40               | C                | -8.19827500             | -1.14280200 | 1.70293400  |
| 41               | H                | -6.69385300             | -2.69131000 | 1.65899000  |
| 42               | C                | -7.79266900             | 0.76498500  | 0.27324000  |
| 43               | H                | -5.98524000             | 0.69078400  | -0.90568100 |
| 44               | C                | -8.59276200             | 0.10217600  | 1.20635100  |
| 45               | H                | -8.81712700             | -1.66162200 | 2.42879600  |
| 46               | H                | -8.10071300             | 1.72684500  | -0.12561000 |

---

|    |    |             |             |             |
|----|----|-------------|-------------|-------------|
| 47 | Cl | -1.76797800 | 2.56265700  | -2.18388900 |
| 48 | Cl | 1.58591300  | 2.65762300  | 2.22830400  |
| 49 | Cl | 0.37085500  | -1.32090600 | 1.92666100  |
| 50 | Cl | 2.16583000  | 2.23144000  | -1.97800400 |
| 51 | Cl | -2.29178700 | 2.02392400  | 2.04956200  |
| 52 | Cl | -0.28760100 | -1.29819600 | -1.94952200 |
| 53 | N  | -4.98873700 | -1.66964000 | -0.11768800 |
| 54 | Cl | -0.25440300 | 7.19502600  | 0.04758600  |
| 55 | H  | -9.52255700 | 0.55143900  | 1.54177000  |
| 56 | N  | 5.08843800  | -1.34974100 | 0.09146200  |
| 57 | C  | 5.49192400  | -2.18744700 | 1.19137900  |
| 58 | C  | 5.45495700  | -1.69269200 | 2.50109600  |
| 59 | C  | 5.96154900  | -3.48079600 | 0.93693700  |
| 60 | C  | 5.87278700  | -2.50360300 | 3.55582800  |
| 61 | H  | 5.11153900  | -0.67929600 | 2.68651000  |
| 62 | C  | 6.38331200  | -4.28065900 | 1.99766200  |
| 63 | H  | 5.99511000  | -3.85066100 | -0.08297000 |
| 64 | C  | 6.33743600  | -3.79690400 | 3.30742400  |
| 65 | H  | 5.84738000  | -2.11742300 | 4.57045500  |
| 66 | H  | 6.74510700  | -5.28511400 | 1.79938900  |
| 67 | H  | 6.66799700  | -4.42323200 | 4.13045700  |
| 68 | C  | 6.04890900  | -1.15315400 | -0.96400400 |
| 69 | C  | 5.71438000  | -1.47327700 | -2.28572300 |
| 70 | C  | 7.32870800  | -0.68075200 | -0.65276600 |
| 71 | C  | 6.65973900  | -1.30175200 | -3.29642100 |
| 72 | H  | 4.72598400  | -1.86080700 | -2.51431600 |
| 73 | C  | 8.26838100  | -0.51937300 | -1.66949400 |
| 74 | H  | 7.58007700  | -0.44377300 | 0.37620500  |
| 75 | C  | 7.93666200  | -0.82564100 | -2.99152700 |
| 76 | H  | 6.40024800  | -1.55302100 | -4.32051100 |
| 77 | H  | 9.26007200  | -0.14912200 | -1.42755200 |
| 78 | H  | 8.67204300  | -0.69838800 | -3.78014900 |

---

**Table S11.** Computational data for **TTM-3DPA<sup>+</sup>**. ( $E = -5042.73$  hartree).

| Centre Number | Atomic Symbol | Coordinates (Angstroms) |             |             |
|---------------|---------------|-------------------------|-------------|-------------|
|               |               | X                       | Y           | Z           |
| 1             | C             | 4.32942600              | -0.06291600 | -0.00048900 |
| 2             | C             | 3.60883000              | 0.79866500  | -0.86119300 |
| 3             | C             | 2.23156400              | 0.82368700  | -0.83913300 |
| 4             | C             | 1.43742800              | -0.02216000 | -0.00037000 |
| 5             | C             | 2.20744300              | -0.89039300 | 0.83798400  |
| 6             | C             | 3.58486900              | -0.90417000 | 0.85993500  |
| 7             | H             | 4.13700000              | 1.44776000  | -1.54591000 |
| 8             | H             | 4.09460400              | -1.56805700 | 1.54444500  |
| 9             | C             | -0.01233700             | -0.00107700 | 0.00029300  |
| 10            | C             | -0.71683300             | 1.26227500  | 0.00604800  |
| 11            | C             | -0.34503500             | 2.36148300  | 0.84695600  |
| 12            | C             | -1.84823600             | 1.53118400  | -0.83126400 |
| 13            | C             | -1.01240700             | 3.56529600  | 0.86482700  |
| 14            | C             | -2.51255500             | 2.73702000  | -0.84809400 |
| 15            | C             | -2.11518300             | 3.79225100  | 0.00719300  |
| 16            | H             | -0.71284400             | 4.32636300  | 1.57269800  |
| 17            | H             | -3.31722100             | 2.88828000  | -1.55496900 |
| 18            | C             | -0.75362000             | -1.24315800 | -0.00488700 |
| 19            | C             | -1.89190700             | -1.47865200 | 0.83316200  |
| 20            | C             | -0.41521200             | -2.35267800 | -0.84637800 |
| 21            | C             | -2.59192500             | -2.66410900 | 0.84987200  |
| 22            | C             | -1.11842800             | -3.53590400 | -0.86458800 |
| 23            | C             | -2.22709600             | -3.73017800 | -0.00650300 |
| 24            | H             | -3.40021500             | -2.79166300 | 1.55728500  |
| 25            | H             | -0.84216600             | -4.30519500 | -1.57304500 |
| 26            | C             | -4.26318700             | -4.99588300 | 0.51727100  |
| 27            | C             | -4.57090200             | -5.96022600 | 1.48425000  |
| 28            | C             | -5.26118700             | -4.13946700 | 0.03454300  |
| 29            | C             | -5.87349900             | -6.05972700 | 1.97002100  |
| 30            | H             | -3.79283000             | -6.62409000 | 1.84763700  |
| 31            | C             | -6.55934000             | -4.24115200 | 0.53345800  |
| 32            | H             | -5.01993600             | -3.40786900 | -0.73072400 |
| 33            | C             | -6.86934900             | -5.20033400 | 1.49983500  |
| 34            | H             | -6.10838500             | -6.80745600 | 2.72173700  |
| 35            | H             | -7.33164000             | -3.57819400 | 0.15448600  |
| 36            | H             | -7.88277700             | -5.28116100 | 1.88131500  |
| 37            | C             | -2.34803500             | -6.12551700 | -0.52441700 |
| 38            | C             | -3.04312600             | -6.86584100 | -1.48796800 |
| 39            | C             | -1.11412000             | -6.58058300 | -0.04181400 |
| 40            | C             | -2.49838100             | -8.05455900 | -1.97051600 |
| 41            | H             | -4.00166700             | -6.50902600 | -1.85136600 |
| 42            | C             | -0.57343000             | -7.76644700 | -0.53759800 |
| 43            | H             | -0.59024900             | -6.01175600 | 0.72046500  |
| 44            | C             | -1.26291600             | -8.50632600 | -1.50053000 |
| 45            | H             | -3.03903700             | -8.62541500 | -2.71962600 |
| 46            | H             | 0.38187400              | -8.11817400 | -0.15916000 |

---

|    |    |             |             |             |
|----|----|-------------|-------------|-------------|
| 47 | H  | -0.84196600 | -9.43270000 | -1.87963600 |
| 48 | C  | 6.46522500  | 0.43334700  | -1.10865200 |
| 49 | C  | 6.24394800  | -0.05607700 | -2.40228400 |
| 50 | C  | 7.45362600  | 1.39777500  | -0.88135600 |
| 51 | C  | 7.00074100  | 0.43455900  | -3.46587200 |
| 52 | H  | 5.48918500  | -0.81904000 | -2.56812500 |
| 53 | C  | 8.21188300  | 1.87476000  | -1.94943400 |
| 54 | H  | 7.62393100  | 1.76529500  | 0.12571500  |
| 55 | C  | 7.98607200  | 1.39870800  | -3.24301500 |
| 56 | H  | 6.82790500  | 0.05136800  | -4.46729600 |
| 57 | H  | 8.97720100  | 2.62404100  | -1.76967900 |
| 58 | H  | 8.57827900  | 1.77360200  | -4.07238700 |
| 59 | C  | 6.45018900  | -0.61778500 | 1.10877200  |
| 60 | C  | 7.41263900  | -1.60827800 | 0.88217000  |
| 61 | C  | 6.24099800  | -0.12278600 | 2.40230100  |
| 62 | C  | 8.15695000  | -2.10550800 | 1.95082300  |
| 63 | H  | 7.57392400  | -1.98009700 | -0.12480500 |
| 64 | C  | 6.98347300  | -0.63363400 | 3.46645700  |
| 65 | H  | 5.50679300  | 0.66009400  | 2.56761100  |
| 66 | C  | 7.94285000  | -1.62376900 | 3.24428800  |
| 67 | H  | 8.90210600  | -2.87497000 | 1.77160600  |
| 68 | H  | 6.82009400  | -0.24608300 | 4.46779100  |
| 69 | H  | 8.52410200  | -2.01449900 | 4.07410100  |
| 70 | Cl | 1.43890300  | -1.93050600 | 2.02597400  |
| 71 | Cl | 1.49253800  | 1.88465700  | -2.02745100 |
| 72 | Cl | -2.37052500 | 0.38153200  | -2.05087700 |
| 73 | Cl | 0.90406700  | 2.18897500  | 2.06791400  |
| 74 | Cl | 0.83815600  | -2.21720200 | -2.06761700 |
| 75 | Cl | -2.37867600 | -0.31457100 | 2.05380400  |
| 76 | N  | 5.70685100  | -0.08206700 | -0.00021400 |
| 77 | N  | -2.92626400 | -4.91582700 | -0.00529300 |
| 78 | C  | -4.11270700 | 5.11812700  | -0.51577800 |
| 79 | C  | -4.39232500 | 6.08969800  | -1.48405200 |
| 80 | C  | -5.13551400 | 4.29301500  | -0.03045500 |
| 81 | C  | -5.69190700 | 6.22764100  | -1.96850900 |
| 82 | H  | -3.59499900 | 6.72915200  | -1.84947000 |
| 83 | C  | -6.43060200 | 4.43298900  | -0.52804900 |
| 84 | H  | -4.91548200 | 3.55573300  | 0.73576000  |
| 85 | C  | -6.71266800 | 5.39947500  | -1.49571000 |
| 86 | H  | -5.90502100 | 6.98085100  | -2.72123900 |
| 87 | H  | -7.22210100 | 3.79426900  | -0.14707200 |
| 88 | H  | -7.72364700 | 5.51020400  | -1.87617900 |
| 89 | C  | -2.16290900 | 6.19079700  | 0.52204400  |
| 90 | C  | -0.91589600 | 6.60694600  | 0.03796900  |
| 91 | C  | -2.83432200 | 6.95378200  | 1.48471300  |
| 92 | C  | -0.33867000 | 7.77642500  | 0.53145500  |
| 93 | H  | -0.41021700 | 6.02104400  | -0.72366100 |
| 94 | C  | -2.25297000 | 8.12598800  | 1.96494400  |
| 95 | H  | -3.80315900 | 6.62725600  | 1.84927500  |
| 96 | C  | -1.00446400 | 8.53875600  | 1.49355100  |

---

---

|     |   |             |            |            |
|-----|---|-------------|------------|------------|
| 97  | H | 0.62675600  | 8.09797500 | 0.15186000 |
| 98  | H | -2.77536600 | 8.71444600 | 2.71339100 |
| 99  | H | -0.55498100 | 9.45236100 | 1.87088300 |
| 100 | N | -2.77822200 | 4.99849500 | 0.00539500 |

---

**Table S12.** Computational data for **TTM-BDPA<sup>+</sup>**. ( $E = -5444.44$  hartree).

| Centre<br>Number | Atomic<br>Symbol | Coordinates (Angstroms) |             |             |
|------------------|------------------|-------------------------|-------------|-------------|
|                  |                  | X                       | Y           | Z           |
| 1                | C                | -3.72525800             | -4.63158300 | 0.02545800  |
| 2                | C                | -4.32817900             | -3.89559800 | 1.04277100  |
| 3                | C                | -4.17644700             | -2.51436900 | 1.05745100  |
| 4                | C                | -3.41989900             | -1.81304000 | 0.08179700  |
| 5                | C                | -2.81408200             | -2.62253600 | -0.91782500 |
| 6                | C                | -2.96647900             | -4.00228400 | -0.95985900 |
| 7                | H                | -4.89510200             | -4.38937900 | 1.82223400  |
| 8                | H                | -2.51225700             | -4.57679100 | -1.75743400 |
| 9                | C                | -3.31727000             | -0.34040800 | 0.05518700  |
| 10               | C                | -4.57006200             | 0.43458900  | 0.14939300  |
| 11               | C                | -5.70414100             | 0.16469600  | -0.66096300 |
| 12               | C                | -4.73986700             | 1.46635500  | 1.11274700  |
| 13               | C                | -6.90562500             | 0.84977900  | -0.52664300 |
| 14               | C                | -5.93679100             | 2.15160000  | 1.27444300  |
| 15               | C                | -7.01554900             | 1.83742600  | 0.44943600  |
| 16               | H                | -7.73654800             | 0.62607700  | -1.18414300 |
| 17               | H                | -6.03134800             | 2.91008900  | 2.04144100  |
| 18               | C                | -2.06527100             | 0.30118200  | -0.05629100 |
| 19               | C                | -1.86058100             | 1.54076400  | -0.78911400 |
| 20               | C                | -0.84719700             | -0.21157500 | 0.55241200  |
| 21               | C                | -0.64224000             | 2.15260600  | -0.91398600 |
| 22               | C                | 0.37050000              | 0.40233000  | 0.44012300  |
| 23               | C                | 0.51886500              | 1.60281000  | -0.30605900 |
| 24               | H                | -0.55372900             | 3.03007100  | -1.54062300 |
| 25               | H                | 1.21659500              | 0.00658700  | 0.98652300  |
| 26               | C                | 1.82140500              | 3.61423600  | -0.74636400 |
| 27               | C                | 2.59132400              | 4.03219000  | -1.83815900 |
| 28               | C                | 1.15683700              | 4.54784700  | 0.05858000  |
| 29               | C                | 2.68385700              | 5.39160500  | -2.12885800 |
| 30               | H                | 3.10095400              | 3.29645700  | -2.45197800 |
| 31               | C                | 1.25656800              | 5.90545200  | -0.24249900 |
| 32               | H                | 0.58230400              | 4.21203900  | 0.91644400  |
| 33               | C                | 2.01770200              | 6.32896100  | -1.33441600 |
| 34               | H                | 3.27290800              | 5.71842600  | -2.98028500 |
| 35               | H                | 0.74781700              | 6.63179700  | 0.38385100  |
| 36               | H                | 2.09483600              | 7.38729300  | -1.56411600 |
| 37               | C                | 2.95693900              | 1.49328300  | -0.27635700 |
| 38               | C                | 4.01992600              | 2.06289900  | 0.44788300  |
| 39               | C                | 3.13990900              | 0.23021500  | -0.86934400 |
| 40               | C                | 5.21468800              | 1.38430900  | 0.59683300  |
| 41               | H                | 3.90188800              | 3.04390300  | 0.89639900  |
| 42               | C                | 4.33580300              | -0.45045400 | -0.72674500 |
| 43               | H                | 2.34201900              | -0.21394700 | -1.45621300 |
| 44               | C                | 5.40698500              | 0.10468100  | 0.01627700  |
| 45               | H                | 6.01934800              | 1.84257900  | 1.15888700  |
| 46               | H                | 4.45355900              | -1.42009600 | -1.19491700 |

---

|    |    |             |             |             |
|----|----|-------------|-------------|-------------|
| 47 | Cl | -1.90333200 | -1.92496300 | -2.24388200 |
| 48 | Cl | -4.86993700 | -1.68801100 | 2.43362800  |
| 49 | Cl | -8.51585700 | 2.69487900  | 0.63783100  |
| 50 | Cl | -3.47058200 | 1.88750300  | 2.24624600  |
| 51 | Cl | -5.62163900 | -0.97490900 | -1.98486300 |
| 52 | Cl | -0.88768300 | -1.55287000 | 1.67414200  |
| 53 | Cl | -3.13189700 | 2.24480900  | -1.76106700 |
| 54 | N  | 1.73671100  | 2.20949400  | -0.43460000 |
| 55 | Cl | -3.91573700 | -6.35920200 | -0.01313900 |
| 56 | N  | 6.60777300  | -0.57443700 | 0.16313500  |
| 57 | C  | 7.00933000  | -1.58862300 | -0.76934900 |
| 58 | C  | 7.04296500  | -1.31382400 | -2.14337600 |
| 59 | C  | 7.40315900  | -2.84770400 | -0.29904900 |
| 60 | C  | 7.45299800  | -2.30082600 | -3.03864600 |
| 61 | H  | 6.75845700  | -0.32900600 | -2.50177100 |
| 62 | C  | 7.82225100  | -3.82466600 | -1.20069400 |
| 63 | H  | 7.38144700  | -3.05263700 | 0.76669400  |
| 64 | C  | 7.84491500  | -3.55735800 | -2.57143500 |
| 65 | H  | 7.48170600  | -2.08065100 | -4.10192500 |
| 66 | H  | 8.12623200  | -4.79922500 | -0.83000700 |
| 67 | H  | 8.17144000  | -4.32128700 | -3.27063700 |
| 68 | C  | 7.49632000  | -0.28797900 | 1.25280600  |
| 69 | C  | 7.02654600  | -0.30850700 | 2.57331400  |
| 70 | C  | 8.84705400  | -0.02069500 | 0.99613700  |
| 71 | C  | 7.90258500  | -0.04639500 | 3.62572900  |
| 72 | H  | 5.98343000  | -0.53805600 | 2.76945800  |
| 73 | C  | 9.71778500  | 0.22916300  | 2.05549100  |
| 74 | H  | 9.20672700  | -0.01181300 | -0.02796400 |
| 75 | C  | 9.24950600  | 0.22147100  | 3.37143400  |
| 76 | H  | 7.53379700  | -0.06770000 | 4.64718800  |
| 77 | H  | 10.76384200 | 0.43682100  | 1.85011200  |
| 78 | H  | 9.93086100  | 0.41785100  | 4.19377600  |

---

**Table S13.** Computational data for **TTM-TDPA<sup>+</sup>**. ( $E = -5961.90$  hartree).

| Centre<br>Number | Atomic<br>Symbol | Coordinates (Angstroms) |             |             |
|------------------|------------------|-------------------------|-------------|-------------|
|                  |                  | X                       | Y           | Z           |
| 1                | C                | -6.27054300             | -3.90580600 | -0.48780500 |
| 2                | C                | -6.58701300             | -3.07288100 | 0.58205500  |
| 3                | C                | -5.87903100             | -1.88788700 | 0.74631300  |
| 4                | C                | -4.83572400             | -1.48533600 | -0.12680300 |
| 5                | C                | -4.55107600             | -2.38687600 | -1.18737200 |
| 6                | C                | -5.25269900             | -3.57068800 | -1.37806600 |
| 7                | H                | -7.36108700             | -3.34714400 | 1.28797200  |
| 8                | H                | -5.01853900             | -4.21411600 | -2.21688500 |
| 9                | C                | -4.13305800             | -0.19112400 | 0.00422700  |
| 10               | C                | -4.96385300             | 1.02528500  | 0.13009700  |
| 11               | C                | -6.03694200             | 1.32016600  | -0.74984200 |
| 12               | C                | -4.77902900             | 1.95054300  | 1.19226100  |
| 13               | C                | -6.86317500             | 2.42665000  | -0.58997300 |
| 14               | C                | -5.59907100             | 3.05638000  | 1.37872700  |
| 15               | C                | -6.64022900             | 3.28650000  | 0.48211300  |
| 16               | H                | -7.65664200             | 2.62104600  | -1.30085000 |
| 17               | H                | -5.43716300             | 3.71962200  | 2.21917500  |
| 18               | C                | -2.72489100             | -0.12041600 | 0.00785300  |
| 19               | C                | -1.97334500             | 0.98061400  | -0.57570900 |
| 20               | C                | -1.87068200             | -1.14293900 | 0.59330800  |
| 21               | C                | -0.60634100             | 1.04658000  | -0.58147200 |
| 22               | C                | -0.50361800             | -1.07850400 | 0.59641300  |
| 23               | C                | 0.17797700              | 0.01865400  | 0.00613400  |
| 24               | H                | -0.11678500             | 1.85724100  | -1.10520400 |
| 25               | H                | 0.06216600              | -1.83891900 | 1.11877600  |
| 26               | C                | 2.22325000              | 1.33297400  | -0.06926800 |
| 27               | C                | 3.31771400              | 1.49982300  | -0.93579700 |
| 28               | C                | 1.82739300              | 2.41122600  | 0.74237000  |
| 29               | C                | 3.98324500              | 2.71003900  | -1.00451700 |
| 30               | H                | 3.62299800              | 0.68078800  | -1.57895200 |
| 31               | C                | 2.49334900              | 3.62214400  | 0.68038800  |
| 32               | H                | 1.01442900              | 2.28323700  | 1.45055000  |
| 33               | C                | 3.58826600              | 3.80719500  | -0.19905400 |
| 34               | H                | 4.80429900              | 2.82749200  | -1.70161500 |
| 35               | H                | 2.19149900              | 4.43039400  | 1.33579200  |
| 36               | C                | 2.33403300              | -1.10688500 | 0.06772500  |
| 37               | C                | 3.43590700              | -1.17873300 | 0.93739300  |
| 38               | C                | 2.03990600              | -2.21222900 | -0.74989900 |
| 39               | C                | 4.20820500              | -2.32417500 | 1.00256000  |
| 40               | H                | 3.68037400              | -0.32914500 | 1.56678800  |
| 41               | C                | 2.81130600              | -3.35968900 | -0.68969100 |
| 42               | H                | 1.20491000              | -2.16605700 | -1.44209800 |
| 43               | C                | 3.91583700              | -3.45006400 | 0.19243800  |
| 44               | H                | 5.05186300              | -2.35863600 | 1.68119200  |
| 45               | H                | 2.56590100              | -4.19860200 | -1.32947300 |
| 46               | Cl               | -3.33927200             | -2.02509100 | -2.40318100 |



---

|    |    |             |             |             |
|----|----|-------------|-------------|-------------|
| 47 | Cl | -6.26606200 | -0.96305600 | 2.18024100  |
| 48 | Cl | -7.67130700 | 4.67183300  | 0.70220300  |
| 49 | Cl | -3.54324600 | 1.71402000  | 2.41465700  |
| 50 | Cl | -6.31812800 | 0.36209800  | -2.18657500 |
| 51 | Cl | -2.54098600 | -2.45065200 | 1.54421500  |
| 52 | Cl | -2.76669700 | 2.22120500  | -1.52242700 |
| 53 | N  | 1.54727200  | 0.08112100  | 0.00124600  |
| 54 | Cl | -7.15344400 | -5.38901700 | -0.71327600 |
| 55 | N  | 4.69124000  | -4.60040100 | 0.25764900  |
| 56 | C  | 4.73493700  | -5.53230000 | -0.83272500 |
| 57 | C  | 5.05352900  | -5.09570300 | -2.12585500 |
| 58 | C  | 4.49150400  | -6.89096400 | -0.59595100 |
| 59 | C  | 5.11074600  | -6.01284600 | -3.17450900 |
| 60 | H  | 5.26169600  | -4.04449000 | -2.30177200 |
| 61 | C  | 4.56314200  | -7.80281900 | -1.64801300 |
| 62 | H  | 4.25146600  | -7.22488900 | 0.40865700  |
| 63 | C  | 4.86805000  | -7.36803700 | -2.93973600 |
| 64 | H  | 5.36158200  | -5.66854800 | -4.17378200 |
| 65 | H  | 4.37340800  | -8.85512300 | -1.45734300 |
| 66 | H  | 4.92128000  | -8.08106500 | -3.75700400 |
| 67 | C  | 5.47574100  | -4.90476100 | 1.41975300  |
| 68 | C  | 4.88312000  | -4.92593800 | 2.68978000  |
| 69 | C  | 6.83386300  | -5.21674000 | 1.27920900  |
| 70 | C  | 5.65133600  | -5.24099800 | 3.80989700  |
| 71 | H  | 3.82506000  | -4.70419000 | 2.79276900  |
| 72 | C  | 7.59133300  | -5.54293900 | 2.40310400  |
| 73 | H  | 7.28655600  | -5.20565300 | 0.29265000  |
| 74 | C  | 7.00574600  | -5.55210300 | 3.67103900  |
| 75 | H  | 5.18501000  | -5.25915000 | 4.79081200  |
| 76 | H  | 8.64390500  | -5.78437300 | 2.28678500  |
| 77 | H  | 7.59939300  | -5.80528600 | 4.54433900  |
| 78 | N  | 4.25632100  | 5.02253700  | -0.26552600 |
| 79 | C  | 5.61083500  | 5.10219800  | -0.73076400 |
| 80 | C  | 5.94822900  | 6.01956400  | -1.73402800 |
| 81 | C  | 6.60392000  | 4.29149700  | -0.16392100 |
| 82 | C  | 7.26931100  | 6.11950400  | -2.16739300 |
| 83 | H  | 5.17651200  | 6.64907900  | -2.16582600 |
| 84 | C  | 7.92048800  | 4.38996400  | -0.61206400 |
| 85 | H  | 6.34248600  | 3.59670800  | 0.62862400  |
| 86 | C  | 8.25822600  | 5.30404100  | -1.61251400 |
| 87 | H  | 7.52399900  | 6.83266200  | -2.94597500 |
| 88 | H  | 8.68623000  | 3.76192600  | -0.16573000 |
| 89 | H  | 9.28599500  | 5.38402600  | -1.95375400 |
| 90 | C  | 3.61738500  | 6.24361200  | 0.13199700  |
| 91 | C  | 4.25577300  | 7.09958100  | 1.03852700  |
| 92 | C  | 2.37356800  | 6.60041200  | -0.40705100 |
| 93 | C  | 3.64959500  | 8.30045100  | 1.40397400  |
| 94 | H  | 5.22151400  | 6.82157400  | 1.44880200  |
| 95 | C  | 1.76940000  | 7.79791100  | -0.02667400 |
| 96 | H  | 1.89167700  | 5.94479200  | -1.12616700 |

---

---

|     |   |            |            |             |
|-----|---|------------|------------|-------------|
| 97  | C | 2.40465000 | 8.65210400 | 0.87743800  |
| 98  | H | 4.14991500 | 8.95933800 | 2.10768300  |
| 99  | H | 0.80754000 | 8.07062500 | -0.45144200 |
| 100 | H | 1.93518200 | 9.58789400 | 1.16561100  |

---

## 22. References.

- 1 M. J. Frisch, G. W. Trucks, H. B. Schlegel, G. E. Scuseria, M. A. Robb, J. R. Cheeseman, G. Scalmani, V. Barone, G. A. Petersson, H. Nakatsuji, M. Caricato, A. Marenich, J. Bloino, B. G. Janesko, R. Gomperts, B. Mennucci, H. P. Hratchian, J. V. Ortiz, A. F. Izmaylov, J. L. Sonnenberg, D. Williams-Young, F. Ding, F. Lipparini, F. Egidi, J. Goings, B. Peng, A. Petrone, T. Henderson, D. Ranasinghe, V. G. Zakrzewski, J. Gao, N. Rega, G. Zheng, W. Liang, M. Hada, M. Ehara, K. Toyota, R. Fukuda, J. Hasegawa, M. Ishida, T. Nakajima, Y. Honda, O. Kitao, H. Nakai, T. Vreven, K. Throssell, J. A. Montgomery, Jr., J. E. Peralta, F. Ogliaro, M. Bearpark, J. J. Heyd, E. Brothers, K. N. Kudin, V. N. Staroverov, T. Keith, R. Kobayashi, J. Normand, K. Raghavachari, A. Rendell, J. C. Burant, S. S. Iyengar, J. Tomasi, M. Cossi, J. M. Millam, M. Klene, C. Adamo, R. Cammi, J. W. Ochterski, R. L. Martin, K. Morokuma, O. Farkas, J. B. Foresman and D. J. Fox, *Gaussian 16, Revision C.01*, Gaussian, Inc.; Wallingford Ct, 2019.
- 2 Y. Zhao and D. G. Truhlar, *Theor. Chem. Acc.*, 2008, **120**, 215-241.
- 3 C. Yan, D. An, W. Chen, N. Zhang, Y. Qiao, J. Fang, X. Lu, G. Zhou and Y. Liu, *CCS Chem.*, 2022, **4**, 3190-3203.
- 4 Q. Peng, A. Obolda, M. Zhang and F. Li, *Angew. Chem.*, 2015, **127**, 7197-7201.
- 5 T.-F. Yang, K. Y. Chiu, H.-C. Cheng, Y. W. Lee, M. Y. Kuo and Y. O. Su, *J. Org. Chem.*, 2012, **77**, 8627-8633.
- 6 Y. Hirao, A. Ito and K. Tanaka, *J. Phys. Chem. A*, 2007, **111**, 2951-2956.
- 7 X. Gao, Z. Cui, Y.-R. Shen, D. Liu, Y.-J. Lin and G.-X. Jin, *J. Am. Chem. Soc.*, 2021, **143**, 17833-17842.
- 8 C. Sun, L. Wen, J. Zeng, Y. Wang, Q. Sun, L. Deng, C. Zhao and Z. Li, *Biomaterials*, 2016, **91**, 81-89.
